# Supplementary material for: An octamolybdate-metal organic framework hybrid for the efficient adsorption of histidine-rich proteins
Source: Royal Society of Chemistry journal article supplement (doi:10.1039/c6tb02090a), 2016-01-01
Supplement: c6tb02090a1.pdf [file c6tb02090a1.pdf]

## Supporting Information

### **An Octamolybdate-Metal Organic Framework Hybrid for the Efficient Adsorption of Histidine-rich Proteins**

Qing Chen, Meng-Meng Wang, Xue Hu, Xu-Wei Chen\*, Jian-Hua Wang\*

Research Center for Analytical Sciences, Department of Chemistry, College of Sciences, Northeastern University, Box 332, Shenyang 110819, China

\*E-mail address: [chenxuwei@mail.neu.edu.cn](mailto:chenxuwei@mail.neu.edu.cn) (X.W. Chen),

[jianhuajrz@mail.neu.edu.cn](mailto:jianhuajrz@mail.neu.edu.cn) (J.H. Wang).

Table S1. The number of total proteins identified in human plasma sample after depleting high abundant proteins by the Mo<sub>8</sub>O<sub>26</sub>@MIL-101 hybrid.

| No. | Peptides $\geq$ 2. | Protein Name                                                                                   | MW [kDa] | calc. pI |
|-----|--------------------|------------------------------------------------------------------------------------------------|----------|----------|
| 1   | P43652             | Afamin OS=Homo sapiens<br>GN=AFM PE=1 SV=1                                                     | 69.024   | 5.9      |
| 2   | P02763             | Alpha-1-acid glycoprotein 1<br>OS=Homo sapiens GN=ORM1<br>PE=1 SV=1                            | 23.497   | 5.02     |
| 3   | P19652             | Alpha-1-acid glycoprotein 2<br>OS=Homo sapiens GN=ORM2<br>PE=1 SV=2                            | 23.588   | 5.11     |
| 4   | A0A024R6I7         | Alpha-1-antitrypsin OS=Homo<br>sapiens GN=SERPINA1 PE=1<br>SV=1                                | 46.679   | 5.59     |
| 5   | P01009             | Alpha-1-antitrypsin OS=Homo<br>sapiens GN=SERPINA1 PE=1<br>SV=3                                | 46.707   | 5.59     |
| 6   | P08697             | Alpha-2-antiplasmin<br>OS=Homo sapiens<br>GN=SERPINF2 PE=1 SV=3                                | 54.531   | 6.29     |
| 7   | P01023             | Alpha-2-macroglobulin<br>OS=Homo sapiens GN=A2M<br>PE=1 SV=3                                   | 163.188  | 6.46     |
| 8   | Q96JD2             | Amyloid lambda 6 light chain<br>variable region NEG<br>(Fragment) OS=Homo sapiens<br>PE=2 SV=1 | 11.901   | 4.94     |
| 9   | Q96JD0             | Amyloid lambda 6 light chain<br>variable region SAR<br>(Fragment) OS=Homo sapiens<br>PE=2 SV=1 | 12.287   | 5.01     |
| 10  | Q59EP2             | Angiotensinogen variant<br>(Fragment) OS=Homo sapiens<br>PE=2 SV=1                             | 53.744   | 6.42     |
| 11  | A2NYQ9             | Anti-folate binding protein<br>(Fragment) OS=Homo sapiens<br>GN=HuVH8B VH PE=2 SV=1            | 13.274   | 8.44     |
| 12  | G3GAU4             | Anti-H1N1 influenza HA<br>kappa chain variable region                                          | 11.599   | 7.96     |

|    |            |                                                                                                                                   |        |      |
|----|------------|-----------------------------------------------------------------------------------------------------------------------------------|--------|------|
|    |            | (Fragment) OS=Homo sapiens<br>PE=2 SV=1                                                                                           |        |      |
| 13 | G1FM85     | Anti-Influenza A<br>hemagglutinin heavy chain<br>variable region (Fragment)<br>OS=Homo sapiens PE=2 SV=1                          | 14.402 | 8.41 |
| 14 | A2JA14     | Anti-mucin1 heavy chain<br>variable region (Fragment)<br>OS=Homo sapiens PE=2 SV=1                                                | 13.9   | 5.41 |
| 15 | A2JA19     | Anti-mucin1 light chain<br>variable region (Fragment)<br>OS=Homo sapiens PE=2 SV=1                                                | 11.651 | 8.91 |
| 16 | A2JA16     | Anti-mucin1 light chain<br>variable region (Fragment)<br>OS=Homo sapiens PE=2 SV=1                                                | 11.614 | 8.46 |
| 17 | Q96SA9     | Anti-streptococcal/anti-myosin<br>immunoglobulin kappa light<br>chain variable region<br>(Fragment) OS=Homo sapiens<br>PE=2 SV=1  | 11.513 | 8.85 |
| 18 | Q96SB0     | Anti-streptococcal/anti-myosin<br>immunoglobulin lambda light<br>chain variable region<br>(Fragment) OS=Homo sapiens<br>PE=2 SV=1 | 11.587 | 6.54 |
| 19 | Q8IZD7     | Anti-thyroglobulin heavy chain<br>variable region (Fragment)<br>OS=Homo sapiens PE=2 SV=1                                         | 13.893 | 8.46 |
| 20 | A2KBC4     | Anti-TN-C scFv (Fragment)<br>OS=Homo sapiens PE=2 SV=1                                                                            | 25.148 | 8.41 |
| 21 | A5PL32     | APOL1 protein (Fragment)<br>OS=Homo sapiens<br>GN=APOL1 PE=2 SV=1                                                                 | 48.486 | 7.17 |
| 22 | P02647     | Apolipoprotein A-I OS=Homo<br>sapiens GN=APOA1 PE=1<br>SV=1                                                                       | 30.759 | 5.76 |
| 23 | V9GYM3     | Apolipoprotein A-II OS=Homo<br>sapiens GN=APOA2 PE=1<br>SV=1                                                                      | 14.905 | 8.27 |
| 24 | P06727     | Apolipoprotein A-IV<br>OS=Homo sapiens<br>GN=APOA4 PE=1 SV=3                                                                      | 45.371 | 5.38 |
| 25 | A0A024R0T8 | Apolipoprotein C-I, isoform<br>CRA_a OS=Homo sapiens                                                                              | 9.326  | 8.47 |

|    |        |                                                                                                                                           |         |      |
|----|--------|-------------------------------------------------------------------------------------------------------------------------------------------|---------|------|
|    |        | GN=APOC1 PE=4 SV=1                                                                                                                        |         |      |
| 26 | C9JF17 | Apolipoprotein D (Fragment)<br>OS=Homo sapiens GN=APOD<br>PE=1 SV=1                                                                       | 24.142  | 5.6  |
| 27 | P02649 | Apolipoprotein E OS=Homo<br>sapiens GN=APOE PE=1<br>SV=1                                                                                  | 36.132  | 5.73 |
| 28 | O95445 | Apolipoprotein M OS=Homo<br>sapiens GN=APOM PE=1<br>SV=2                                                                                  | 21.239  | 6.01 |
| 29 | O75882 | Attractin OS=Homo sapiens<br>GN=ATRN PE=1 SV=2                                                                                            | 158.432 | 7.31 |
| 30 | P02749 | Beta-2-glycoprotein 1<br>OS=Homo sapiens GN=APOH<br>PE=1 SV=3                                                                             | 38.273  | 7.97 |
| 31 | P43251 | Biotinidase OS=Homo sapiens<br>GN=BTD PE=1 SV=2                                                                                           | 61.093  | 6.25 |
| 32 | Q59EA3 | Cadherin 5, type 2<br>preproprotein variant<br>(Fragment) OS=Homo sapiens<br>PE=2 SV=1                                                    | 89.868  | 5.48 |
| 33 | D3DNN4 | Carboxylic ester hydrolase<br>OS=Homo sapiens GN=BCHE<br>PE=3 SV=1                                                                        | 72.836  | 7.55 |
| 34 | O43866 | CD5 antigen-like OS=Homo<br>sapiens GN=CD5L PE=1<br>SV=1                                                                                  | 38.063  | 5.47 |
| 35 | Q96K68 | cDNA FLJ14473 fis, clone<br>MAMMA1001080, highly<br>similar to Homo sapiens<br>SNC73 protein (SNC73)<br>mRNA OS=Homo sapiens<br>PE=2 SV=1 | 53.054  | 6.86 |
| 36 | Q6ZP85 | CDNA FLJ26301 fis, clone<br>DMC07540 OS=Homo sapiens<br>PE=2 SV=1                                                                         | 25.787  | 8.38 |
| 37 | Q6ZNX5 | CDNA FLJ26936 fis, clone<br>RCT06808 OS=Homo sapiens<br>PE=2 SV=1                                                                         | 17.663  | 7.52 |
| 38 | B3KS79 | cDNA FLJ35730 fis, clone<br>TESTI2003131, highly similar<br>to ALPHA-1-<br>ANTICHYMOTRYPSIN<br>OS=Homo sapiens PE=2 SV=1                  | 50.596  | 5.63 |

|    |        |                                                                                                                                                  |         |      |
|----|--------|--------------------------------------------------------------------------------------------------------------------------------------------------|---------|------|
| 39 | Q6ZVX0 | cDNA FLJ41981 fis, clone SMINT2011888, highly similar to Protein Tro alpha1 H,myeloma OS=Homo sapiens PE=2 SV=1                                  | 52.841  | 5.92 |
| 40 | B4E1B2 | cDNA FLJ53691, highly similar to Serotransferrin OS=Homo sapiens PE=2 SV=1                                                                       | 74.783  | 7.12 |
| 41 | B7Z8Q2 | cDNA FLJ55606, highly similar to Alpha-2-HS-glycoprotein OS=Homo sapiens PE=2 SV=1                                                               | 46.597  | 6.28 |
| 42 | B4DRF2 | cDNA FLJ58124, highly similar to Complement factor I (EC 3.4.21.45) OS=Homo sapiens PE=2 SV=1                                                    | 66.651  | 7.52 |
| 43 | A8K6Q8 | cDNA FLJ75881, highly similar to Homo sapiens transferrin receptor (p90, CD71) (TFRC), mRNA OS=Homo sapiens PE=2 SV=1                            | 84.82   | 6.61 |
| 44 | A8K5A4 | cDNA FLJ76826, highly similar to Homo sapiens ceruloplasmin (ferroxidase) (CP), mRNA OS=Homo sapiens PE=2 SV=1                                   | 122.095 | 5.74 |
| 45 | A8K2N0 | cDNA FLJ77835, highly similar to Homo sapiens complement component 1, s subcomponent (C1S), transcript variant 2, mRNA OS=Homo sapiens PE=2 SV=1 | 76.563  | 4.98 |
| 46 | A8K8Z4 | cDNA FLJ78071, highly similar to Human MHC class III complement component C6 mRNA OS=Homo sapiens PE=2 SV=1                                      | 104.649 | 6.62 |
| 47 | A8K2T4 | cDNA FLJ78207, highly similar to Human complement protein component C7 mRNA OS=Homo sapiens PE=2 SV=1                                            | 93.346  | 6.51 |
| 48 | A8K008 | cDNA FLJ78387 OS=Homo sapiens PE=1 SV=1                                                                                                          | 51.564  | 8.16 |

|    |        |                                                                                                                                                                                             |         |      |
|----|--------|---------------------------------------------------------------------------------------------------------------------------------------------------------------------------------------------|---------|------|
| 49 | Q8NCL6 | cDNA FLJ90170 fis, clone MAMMA1000370, highly similar to Ig alpha-1 chain C region OS=Homo sapiens PE=2 SV=1                                                                                | 53.19   | 6.52 |
| 50 | B2R6V9 | cDNA, FLJ93141, highly similar to Homo sapiens coagulation factor XIII, A1 polypeptide (F13A1), mRNA OS=Homo sapiens PE=2 SV=1                                                              | 83.189  | 6    |
| 51 | B2R7D1 | cDNA, FLJ93387, highly similar to Homo sapiens transglutaminase 4 (prostate) (TGM4), mRNA OS=Homo sapiens PE=2 SV=1                                                                         | 77.08   | 6.76 |
| 52 | B2R8I2 | cDNA, FLJ93914, highly similar to Homo sapiens histidine-rich glycoprotein (HRG), mRNA OS=Homo sapiens PE=2 SV=1                                                                            | 59.475  | 7.44 |
| 53 | B2R9F2 | cDNA, FLJ94361, highly similar to Homo sapiens serine (or cysteine) proteinase inhibitor, clade A(alpha-1 antiproteinase, antitrypsin), member 6 (SERPINA6), mRNA OS=Homo sapiens PE=2 SV=1 | 45.066  | 6.04 |
| 54 | B2RA39 | cDNA, FLJ94686, highly similar to Homo sapiens complement factor H-related 5 (CFHL5), mRNA OS=Homo sapiens PE=2 SV=1                                                                        | 64.349  | 7.06 |
| 55 | P10909 | Clusterin OS=Homo sapiens GN=CLU PE=1 SV=1                                                                                                                                                  | 52.461  | 6.27 |
| 56 | P00742 | Coagulation factor X OS=Homo sapiens GN=F10 PE=1 SV=2                                                                                                                                       | 54.697  | 5.94 |
| 57 | Q8NCX0 | Coiled-coil domain-containing protein 150 OS=Homo sapiens GN=CCDC150 PE=1 SV=2                                                                                                              | 128.681 | 7.02 |
| 58 | A2NB45 | Cold agglutinin FS-1 L-chain (Fragment) OS=Homo sapiens PE=2 SV=1                                                                                                                           | 12.38   | 8.48 |

|    |            |                                                                                              |         |      |
|----|------------|----------------------------------------------------------------------------------------------|---------|------|
| 59 | A2NB44     | Cold agglutinin FS-2 H-chain (Fragment) OS=Homo sapiens GN=IGH@ PE=2 SV=1                    | 12.753  | 7.11 |
| 60 | A0A0G2JPR0 | Complement C4-A OS=Homo sapiens GN=C4A PE=1 SV=1                                             | 192.754 | 7.03 |
| 61 | A0A024R035 | Complement component 9, isoform CRA_a OS=Homo sapiens GN=C9 PE=4 SV=1                        | 63.163  | 5.52 |
| 62 | P07357     | Complement component C8 alpha chain OS=Homo sapiens GN=C8A PE=1 SV=2                         | 65.121  | 6.47 |
| 63 | B1N7B6     | Cryocryoglobulin CC1 heavy chain variable region (Fragment) OS=Homo sapiens PE=2 SV=1        | 13.184  | 8.48 |
| 64 | B1N7B9     | Cryocryoglobulin CC2 lambda light chain variable region (Fragment) OS=Homo sapiens PE=2 SV=1 | 11.308  | 7.97 |
| 65 | A0A024R2Q7 | C-type lectin domain family 3, member B, isoform CRA_a OS=Homo sapiens GN=CLEC3B PE=4 SV=1   | 22.522  | 5.67 |
| 66 | J3KPA1     | Cysteine-rich secretory protein 3 OS=Homo sapiens GN=CRISP3 PE=1 SV=1                        | 30.955  | 7.61 |
| 67 | P81605     | Dermcidin OS=Homo sapiens GN=DCD PE=1 SV=2                                                   | 11.277  | 6.54 |
| 68 | P09172     | Dopamine beta-hydroxylase OS=Homo sapiens GN=DBH PE=1 SV=3                                   | 69.021  | 6.42 |
| 69 | Q0VDD8     | Dynein heavy chain 14, axonemal OS=Homo sapiens GN=DNAH14 PE=2 SV=3                          | 399.64  | 6.93 |
| 70 | B6EDE2     | Epididymis luminal protein 180 (Fragment) OS=Homo sapiens GN=HEL180 PE=2 SV=1                | 13.28   | 5.45 |
| 71 | V9HW68     | Epididymis luminal protein 214 OS=Homo sapiens GN=HEL-214 PE=2 SV=1                          | 51.683  | 7.75 |
| 72 | V9HWD8     | Epididymis secretory sperm binding protein Li 163pA OS=Homo sapiens GN=HEL-                  | 54.22   | 5.86 |

|    |                |                                                                                                              |        |      |
|----|----------------|--------------------------------------------------------------------------------------------------------------|--------|------|
|    |                | S-163pA PE=2 SV=1                                                                                            |        |      |
| 73 | V9HWA9         | Epididymis secretory sperm binding protein Li 62p<br>OS=Homo sapiens GN=HEL-S-62p PE=2 SV=1                  | 187.03 | 6.4  |
| 74 | A0N7I9         | F5-20 (Fragment) OS=Homo sapiens GN=F5-20 PE=2 SV=1                                                          | 13.411 | 9.1  |
| 75 | A0A0M3KK<br>W6 | Fab Hu 15C1 Heavy chain<br>OS=Homo sapiens PE=1 SV=1                                                         | 24.059 | 8.85 |
| 76 | P23142         | Fibulin-1 OS=Homo sapiens<br>GN=FBLN1 PE=1 SV=4                                                              | 77.162 | 5.22 |
| 77 | Q8NF20         | FLJ00382 protein (Fragment)<br>OS=Homo sapiens<br>GN=FLJ00382 PE=2 SV=1                                      | 52.892 | 8.66 |
| 78 | Q8NF17         | FLJ00385 protein (Fragment)<br>OS=Homo sapiens<br>GN=FLJ00385 PE=1 SV=1                                      | 56.075 | 7.59 |
| 79 | Q86TT1         | Full-length cDNA clone<br>CS0DD006YL02 of<br>Neuroblastoma of Homo sapiens (human) OS=Homo sapiens PE=2 SV=1 | 41.247 | 6.79 |
| 80 | P06396         | Gelsolin OS=Homo sapiens<br>GN=GSN PE=1 SV=1                                                                 | 85.644 | 6.28 |
| 81 | P22352         | Glutathione peroxidase 3<br>OS=Homo sapiens GN=GPX3<br>PE=1 SV=2                                             | 25.537 | 8.13 |
| 82 | P00738         | Haptoglobin OS=Homo sapiens<br>GN=HP PE=1 SV=1                                                               | 45.177 | 6.58 |
| 83 | P00739         | Haptoglobin-related protein<br>OS=Homo sapiens GN=HPR<br>PE=2 SV=2                                           | 39.005 | 7.09 |
| 84 | A2NYU7         | Heavy chain Fab (Fragment)<br>OS=Homo sapiens PE=2 SV=1                                                      | 13.983 | 9.25 |
| 85 | A2NYU8         | Heavy chain Fab (Fragment)<br>OS=Homo sapiens PE=2 SV=1                                                      | 12.667 | 9.2  |
| 86 | A2NYV1         | Heavy chain Fab (Fragment)<br>OS=Homo sapiens PE=2 SV=1                                                      | 14.271 | 6.54 |
| 87 | A2NYV0         | Heavy chain Fab (Fragment)<br>OS=Homo sapiens PE=2 SV=1                                                      | 13.25  | 9.29 |
| 88 | Q6LAM1         | Heavy chain of factor I (Fragment) OS=Homo sapiens<br>PE=2 SV=1                                              | 35.859 | 7.59 |



|     |                |                                                                            |         |       |
|-----|----------------|----------------------------------------------------------------------------|---------|-------|
| 89  | A2NXP8         | Heavy chain variable region (Fragment) OS=Homo sapiens PE=2 SV=1           | 13.825  | 9.72  |
| 90  | D9YZU5         | Hemoglobin, beta OS=Homo sapiens GN=HBB PE=3 SV=1                          | 15.988  | 7.28  |
| 91  | P02790         | Hemopexin OS=Homo sapiens GN=HPX PE=1 SV=2                                 | 51.643  | 7.02  |
| 92  | P05546         | Heparin cofactor 2 OS=Homo sapiens GN=SERPIND1 PE=1 SV=3                   | 57.034  | 6.9   |
| 93  | O15431         | High affinity copper uptake protein 1 OS=Homo sapiens GN=SLC31A1 PE=1 SV=1 | 21.076  | 7.42  |
| 94  | Q86YZ3         | Hornerin OS=Homo sapiens GN=HRNR PE=1 SV=2                                 | 282.228 | 10.04 |
| 95  | A2IPI6         | HRV Fab 027-VL (Fragment) OS=Homo sapiens PE=2 SV=1                        | 12.375  | 9.41  |
| 96  | A0A087X079     | Ig gamma-1 chain C region OS=Homo sapiens GN=IGHG1 PE=1 SV=1               | 51.88   | 8.07  |
| 97  | A0A087WYC<br>5 | Ig gamma-1 chain C region OS=Homo sapiens GN=IGHG1 PE=1 SV=1               | 52.393  | 8.21  |
| 98  | A0A087WYE<br>1 | Ig gamma-1 chain C region OS=Homo sapiens GN=IGHG1 PE=1 SV=1               | 52.077  | 7.55  |
| 99  | A0A087X010     | Ig gamma-1 chain C region OS=Homo sapiens GN=IGHG1 PE=1 SV=1               | 50.79   | 8.18  |
| 100 | P01859         | Ig gamma-2 chain C region OS=Homo sapiens GN=IGHG2 PE=1 SV=2               | 35.878  | 7.59  |
| 101 | A0A087WXL<br>8 | Ig gamma-3 chain C region OS=Homo sapiens GN=IGHG3 PE=1 SV=1               | 56.853  | 8.25  |
| 102 | A0A0G2JPD<br>4 | Ig gamma-4 chain C region (Fragment) OS=Homo sapiens GN=IGHG4 PE=1 SV=2    | 35.918  | 7.36  |
| 103 | A0A068LKQ<br>2 | Ig heavy chain variable region (Fragment) OS=Homo sapiens PE=2 SV=1        | 13.15   | 9.07  |
| 104 | A0A068LKQ<br>5 | Ig heavy chain variable region (Fragment) OS=Homo sapiens PE=2 SV=1        | 13.626  | 8.69  |

|     |                |                                                                           |        |      |
|-----|----------------|---------------------------------------------------------------------------|--------|------|
| 105 | A0A068LRX<br>1 | Ig heavy chain variable region<br>(Fragment) OS=Homo sapiens<br>PE=2 SV=1 | 11.209 | 9.5  |
| 106 | A0A068LN03     | Ig heavy chain variable region<br>(Fragment) OS=Homo sapiens<br>PE=2 SV=1 | 13.376 | 8.43 |
| 107 | A0A068LKQ<br>0 | Ig heavy chain variable region<br>(Fragment) OS=Homo sapiens<br>PE=4 SV=1 | 13.345 | 5.99 |
| 108 | P23083         | Ig heavy chain V-I region V35<br>OS=Homo sapiens PE=1 SV=1                | 13     | 9.55 |
| 109 | P06331         | Ig heavy chain V-II region<br>ARH-77 OS=Homo sapiens<br>PE=4 SV=1         | 16.218 | 8.28 |
| 110 | P04438         | Ig heavy chain V-II region<br>SESS OS=Homo sapiens PE=2<br>SV=1           | 16.312 | 7.09 |
| 111 | P01767         | Ig heavy chain V-III region<br>BUT OS=Homo sapiens PE=1<br>SV=1           | 12.371 | 9.25 |
| 112 | P01768         | Ig heavy chain V-III region<br>CAM OS=Homo sapiens PE=1<br>SV=1           | 13.659 | 9.63 |
| 113 | P01769         | Ig heavy chain V-III region<br>GA OS=Homo sapiens PE=1<br>SV=1            | 13.157 | 9.77 |
| 114 | P01781         | Ig heavy chain V-III region<br>GAL OS=Homo sapiens PE=1<br>SV=1           | 12.722 | 8.48 |
| 115 | P80419         | Ig heavy chain V-III region<br>GAR OS=Homo sapiens PE=1<br>SV=1           | 13.079 | 4.81 |
| 116 | P01775         | Ig heavy chain V-III region<br>LAY OS=Homo sapiens PE=1<br>SV=1           | 12.85  | 8.48 |
| 117 | P01765         | Ig heavy chain V-III region<br>TIL OS=Homo sapiens PE=1<br>SV=1           | 12.348 | 9.13 |
| 118 | P01762         | Ig heavy chain V-III region<br>TRO OS=Homo sapiens PE=1<br>SV=1           | 13.464 | 9.72 |
| 119 | P01779         | Ig heavy chain V-III region<br>TUR OS=Homo sapiens PE=1<br>SV=1           | 12.423 | 9.73 |

|     |                |                                                                                       |        |      |
|-----|----------------|---------------------------------------------------------------------------------------|--------|------|
| 120 | P01763         | Ig heavy chain V-III region<br>WEA OS=Homo sapiens PE=1<br>SV=1                       | 12.249 | 8.5  |
| 121 | A0A075B6H<br>6 | Ig kappa chain C region<br>(Fragment) OS=Homo sapiens<br>GN=IGKC PE=1 SV=1            | 11.712 | 5.87 |
| 122 | A0A087X130     | Ig kappa chain C region<br>OS=Homo sapiens GN=IGKC<br>PE=1 SV=1                       | 25.12  | 6.32 |
| 123 | A0A087WTX<br>5 | Ig kappa chain C region<br>OS=Homo sapiens GN=IGKC<br>PE=1 SV=1                       | 25.608 | 7.97 |
| 124 | P04430         | Ig kappa chain V-I region<br>BAN OS=Homo sapiens PE=1<br>SV=1                         | 11.833 | 8.44 |
| 125 | P01597         | Ig kappa chain V-I region DEE<br>OS=Homo sapiens PE=1 SV=1                            | 11.654 | 9.36 |
| 126 | P01599         | Ig kappa chain V-I region Gal<br>OS=Homo sapiens PE=1 SV=1                            | 11.807 | 8.88 |
| 127 | P01604         | Ig kappa chain V-I region Kue<br>OS=Homo sapiens PE=1 SV=1                            | 12.119 | 8.81 |
| 128 | P01605         | Ig kappa chain V-I region Lay<br>OS=Homo sapiens PE=1 SV=1                            | 11.827 | 7.96 |
| 129 | P01612         | Ig kappa chain V-I region Mev<br>OS=Homo sapiens PE=1 SV=1                            | 11.863 | 6.57 |
| 130 | P01613         | Ig kappa chain V-I region Ni<br>OS=Homo sapiens PE=1 SV=1                             | 12.238 | 5.36 |
| 131 | P01606         | Ig kappa chain V-I region OU<br>OS=Homo sapiens PE=1 SV=1                             | 11.77  | 9.91 |
| 132 | P01609         | Ig kappa chain V-I region Scw<br>OS=Homo sapiens PE=1 SV=1                            | 11.757 | 6    |
| 133 | P01611         | Ig kappa chain V-I region Wes<br>OS=Homo sapiens PE=1 SV=1                            | 11.601 | 7.28 |
| 134 | P01601         | Ig kappa chain V-ID region 16<br>(Fragment) OS=Homo sapiens<br>GN=IGKV1D-16 PE=4 SV=2 | 12.722 | 7.74 |
| 135 | P01615         | Ig kappa chain V-II region FR<br>OS=Homo sapiens PE=1 SV=1                            | 12.652 | 7.94 |
| 136 | P01616         | Ig kappa chain V-II region<br>MIL OS=Homo sapiens PE=1<br>SV=1                        | 12.048 | 9.29 |
| 137 | P01619         | Ig kappa chain V-III region B6<br>OS=Homo sapiens PE=1 SV=1                           | 11.628 | 9.25 |

|     |                |                                                                                |        |      |
|-----|----------------|--------------------------------------------------------------------------------|--------|------|
| 138 | P04207         | Ig kappa chain V-III region<br>CLL OS=Homo sapiens PE=4<br>SV=2                | 14.266 | 8.51 |
| 139 | P04206         | Ig kappa chain V-III region<br>GOL OS=Homo sapiens PE=1<br>SV=1                | 11.823 | 9.25 |
| 140 | P01621         | Ig kappa chain V-III region<br>NG9 (Fragment) OS=Homo<br>sapiens PE=2 SV=1     | 10.722 | 6.52 |
| 141 | P01624         | Ig kappa chain V-III region<br>POM OS=Homo sapiens PE=1<br>SV=1                | 11.915 | 8.94 |
| 142 | P01620         | Ig kappa chain V-III region<br>SIE OS=Homo sapiens PE=1<br>SV=1                | 11.768 | 8.48 |
| 143 | P06313         | Ig kappa chain V-IV region JI<br>OS=Homo sapiens PE=4 SV=1                     | 14.623 | 6.58 |
| 144 | P01625         | Ig kappa chain V-IV region<br>Len OS=Homo sapiens PE=1<br>SV=2                 | 12.632 | 7.93 |
| 145 | P01703         | Ig lambda chain V-I region<br>NEWM OS=Homo sapiens<br>PE=1 SV=1                | 10.898 | 9.29 |
| 146 | P01707         | Ig lambda chain V-II region<br>TRO OS=Homo sapiens PE=1<br>SV=1                | 11.554 | 8.29 |
| 147 | P01714         | Ig lambda chain V-III region<br>SH OS=Homo sapiens PE=1<br>SV=1                | 11.386 | 6.52 |
| 148 | P06889         | Ig lambda chain V-IV region<br>MOL OS=Homo sapiens PE=1<br>SV=1                | 11.265 | 4.42 |
| 149 | P01719         | Ig lambda chain V-V region<br>DEL OS=Homo sapiens PE=1<br>SV=1                 | 11.336 | 5.36 |
| 150 | A0A075B6L1     | Ig lambda-7 chain C region<br>(Fragment) OS=Homo sapiens<br>GN=IGLC7 PE=1 SV=2 | 11.3   | 8.29 |
| 151 | A0A087X2C<br>0 | Ig mu chain C region<br>OS=Homo sapiens GN=IGHM<br>PE=1 SV=1                   | 64.066 | 7.14 |
| 152 | A0A087WYJ<br>9 | Ig mu chain C region<br>OS=Homo sapiens GN=IGHM<br>PE=1 SV=1                   | 65.66  | 6.95 |

|     |                |                                                                       |        |      |
|-----|----------------|-----------------------------------------------------------------------|--------|------|
| 153 | S6B291         | IgG H chain OS=Homo sapiens PE=1 SV=1                                 | 50.838 | 7.77 |
| 154 | S6BGE0         | IgG H chain OS=Homo sapiens PE=2 SV=1                                 | 32.161 | 7.85 |
| 155 | S6BGF5         | IgG H chain OS=Homo sapiens PE=2 SV=1                                 | 25.584 | 8.56 |
| 156 | S6BAP0         | IgG H chain OS=Homo sapiens PE=2 SV=1                                 | 24.023 | 8.54 |
| 157 | S6B2A6         | IgG H chain OS=Homo sapiens PE=2 SV=1                                 | 32.147 | 7.25 |
| 158 | S6BGD4         | IgG H chain OS=Homo sapiens PE=2 SV=1                                 | 25     | 9.48 |
| 159 | S6B2B6         | IgG H chain OS=Homo sapiens PE=2 SV=1                                 | 29.342 | 8.68 |
| 160 | S6BGD6         | IgG L chain OS=Homo sapiens PE=1 SV=1                                 | 24.808 | 7.24 |
| 161 | S6B2B0         | IgG L chain OS=Homo sapiens PE=2 SV=1                                 | 23.102 | 8.53 |
| 162 | S6AWE6         | IgG L chain OS=Homo sapiens PE=2 SV=1                                 | 22.891 | 8.43 |
| 163 | S6BAR0         | IgG L chain OS=Homo sapiens PE=2 SV=1                                 | 23.107 | 7.69 |
| 164 | S6C4R7         | IgG L chain OS=Homo sapiens PE=2 SV=1                                 | 22.499 | 8.24 |
| 165 | S6B2A1         | IgG L chain OS=Homo sapiens PE=2 SV=1                                 | 20.36  | 5.52 |
| 166 | S6AWD3         | IgG L chain OS=Homo sapiens PE=2 SV=1                                 | 19.929 | 8.91 |
| 167 | Q6GMX6         | IGH@ protein OS=Homo sapiens GN=IGH@ PE=1 SV=1                        | 51.051 | 8.69 |
| 168 | Q6P089         | IGH@ protein OS=Homo sapiens GN=IGH@ PE=2 SV=1                        | 51.965 | 6.32 |
| 169 | A0A0F7T6Q<br>1 | IGHV1-2 protein (Fragment)<br>OS=Homo sapiens<br>GN=IGHV1-2 PE=4 SV=1 | 11.904 | 9.29 |
| 170 | A0A0F7T983     | IGHV1-2 protein (Fragment)<br>OS=Homo sapiens<br>GN=IGHV1-2 PE=4 SV=1 | 11.185 | 8.12 |
| 171 | A0A0F7TD4<br>9 | IGHV3-7 protein (Fragment)<br>OS=Homo sapiens<br>GN=IGHV3-7 PE=4 SV=1 | 12.104 | 6.57 |

|     |                |                                                                                       |        |      |
|-----|----------------|---------------------------------------------------------------------------------------|--------|------|
| 172 | A0A0F7T8I6     | IGHV4-31 protein (Fragment)<br>OS=Homo sapiens<br>GN=IGHV4-31 PE=4 SV=1               | 10.839 | 8.44 |
| 173 | A0A0F7T931     | IGHV4-39 protein (Fragment)<br>OS=Homo sapiens<br>GN=IGHV4-39 PE=4 SV=1               | 11.565 | 8.43 |
| 174 | A0A0F7TAV<br>4 | IGHV5-51 protein (Fragment)<br>OS=Homo sapiens<br>GN=IGHV5-51 PE=4 SV=1               | 12.142 | 8.38 |
| 175 | Q6PIL8         | IGK@ protein OS=Homo<br>sapiens GN=IGK@ PE=1<br>SV=1                                  | 25.818 | 6.55 |
| 176 | Q6P5S8         | IGK@ protein OS=Homo<br>sapiens GN=IGK@ PE=1<br>SV=1                                  | 25.757 | 6.33 |
| 177 | Q8N355         | IGL@ protein OS=Homo<br>sapiens GN=IGL@ PE=1<br>SV=1                                  | 24.777 | 6.37 |
| 178 | Q6PIQ7         | IGL@ protein OS=Homo<br>sapiens GN=IGL@ PE=1<br>SV=1                                  | 25.005 | 7.97 |
| 179 | Q5FWF9         | IGL@ protein OS=Homo<br>sapiens GN=IGL@ PE=1<br>SV=1                                  | 24.779 | 5.59 |
| 180 | Q6IN99         | IGL@ protein OS=Homo<br>sapiens GN=IGL@ PE=2<br>SV=1                                  | 24.872 | 6.74 |
| 181 | Q567P1         | IGL@ protein OS=Homo<br>sapiens GN=IGL@ PE=2<br>SV=1                                  | 24.784 | 7.3  |
| 182 | Q6NS95         | IGL@ protein OS=Homo<br>sapiens GN=IGL@ PE=2<br>SV=1                                  | 25.132 | 6.67 |
| 183 | Q0ZCI9         | Immunoglobulin heavy chain<br>variable region (Fragment)<br>OS=Homo sapiens PE=1 SV=1 | 14.129 | 7.94 |
| 184 | Q0ZCH9         | Immunoglobulin heavy chain<br>variable region (Fragment)<br>OS=Homo sapiens PE=4 SV=1 | 13.428 | 8.46 |
| 185 | Q0ZCH6         | Immunoglobulin heavy chain<br>variable region (Fragment)<br>OS=Homo sapiens PE=4 SV=1 | 14.327 | 6.55 |
| 186 | Q0ZCI6         | Immunoglobulin heavy chain<br>variable region (Fragment)                              | 13.625 | 8.43 |

|     |            |                                                                                       |         |      |
|-----|------------|---------------------------------------------------------------------------------------|---------|------|
|     |            | OS=Homo sapiens PE=4 SV=1                                                             |         |      |
| 187 | Q0ZCJ1     | Immunoglobulin heavy chain variable region (Fragment)<br>OS=Homo sapiens PE=4 SV=1    | 13.377  | 8.43 |
| 188 | Q0ZCF6     | Immunoglobulin heavy chain variable region (Fragment)<br>OS=Homo sapiens PE=4 SV=1    | 14.538  | 8.78 |
| 189 | Q0ZCI2     | Immunoglobulin heavy chain variable region (Fragment)<br>OS=Homo sapiens PE=4 SV=1    | 13.316  | 9.1  |
| 190 | Q0ZCH8     | Immunoglobulin heavy chain variable region (Fragment)<br>OS=Homo sapiens PE=4 SV=1    | 12.459  | 7.96 |
| 191 | Q9NPP6     | Immunoglobulin heavy chain variant (Fragment) OS=Homo sapiens PE=2 SV=1               | 44.758  | 6.13 |
| 192 | P01591     | Immunoglobulin J chain<br>OS=Homo sapiens<br>GN=JCHAIN PE=1 SV=4                      | 18.087  | 5.24 |
| 193 | A0A087WX49 | Immunoglobulin lambda-like polypeptide 5 OS=Homo sapiens GN=IGLL5 PE=1 SV=1           | 24.928  | 6.52 |
| 194 | D3DRR6     | Inter-alpha (Globulin) inhibitor H2, isoform CRA_a OS=Homo sapiens GN=ITIH2 PE=4 SV=1 | 106.502 | 6.95 |
| 195 | P19827     | Inter-alpha-trypsin inhibitor heavy chain H1 OS=Homo sapiens GN=ITIH1 PE=1 SV=3       | 101.326 | 6.79 |
| 196 | Q06033     | Inter-alpha-trypsin inhibitor heavy chain H3 OS=Homo sapiens GN=ITIH3 PE=1 SV=2       | 99.787  | 5.74 |
| 197 | B7ZKJ8     | ITIH4 protein OS=Homo sapiens GN=ITIH4 PE=1 SV=1                                      | 103.816 | 6.89 |
| 198 | H6VRG1     | Keratin 1 OS=Homo sapiens GN=KRT1 PE=3 SV=1                                           | 66.086  | 8.12 |
| 199 | H6VRG2     | Keratin 1 OS=Homo sapiens GN=KRT1 PE=3 SV=1                                           | 66.026  | 8.12 |
| 200 | P13645     | Keratin, type I cytoskeletal 10 OS=Homo sapiens                                       | 58.792  | 5.21 |

|     |                |                                                                                                                                        |        |      |
|-----|----------------|----------------------------------------------------------------------------------------------------------------------------------------|--------|------|
|     |                | GN=KRT10 PE=1 SV=6                                                                                                                     |        |      |
| 201 | P13646         | Keratin, type I cytoskeletal 13<br>OS=Homo sapiens<br>GN=KRT13 PE=1 SV=4                                                               | 49.557 | 4.96 |
| 202 | P08779         | Keratin, type I cytoskeletal 16<br>OS=Homo sapiens<br>GN=KRT16 PE=1 SV=4                                                               | 51.236 | 5.05 |
| 203 | P35527         | Keratin, type I cytoskeletal 9<br>OS=Homo sapiens GN=KRT9<br>PE=1 SV=3                                                                 | 62.027 | 5.24 |
| 204 | P35908         | Keratin, type II cytoskeletal 2<br>epidermal OS=Homo sapiens<br>GN=KRT2 PE=1 SV=2                                                      | 65.393 | 8    |
| 205 | P13647         | Keratin, type II cytoskeletal 5<br>OS=Homo sapiens GN=KRT5<br>PE=1 SV=3                                                                | 62.34  | 7.74 |
| 206 | P04259         | Keratin, type II cytoskeletal 6B<br>OS=Homo sapiens<br>GN=KRT6B PE=1 SV=5                                                              | 60.03  | 8    |
| 207 | Q5T749         | Keratinocyte proline-rich<br>protein OS=Homo sapiens<br>GN=KPRP PE=1 SV=1                                                              | 64.093 | 8.27 |
| 208 | D3DNU8         | Kininogen 1, isoform CRA_a<br>OS=Homo sapiens GN=KNG1<br>PE=4 SV=1                                                                     | 47.823 | 6.65 |
| 209 | C6KXN3         | Lambda light chain of human<br>immunoglobulin surface<br>antigen-related protein<br>(Fragment) OS=Homo sapiens<br>GN=IgLC-rG PE=1 SV=1 | 24.726 | 5.54 |
| 210 | A2NUT2         | Lambda-chain (AA -20 to 215)<br>OS=Homo sapiens PE=1 SV=1                                                                              | 24.639 | 7.62 |
| 211 | P02750         | Leucine-rich alpha-2-<br>glycoprotein OS=Homo<br>sapiens GN=LRG1 PE=1<br>SV=2                                                          | 38.154 | 6.95 |
| 212 | P51884         | Lumican OS=Homo sapiens<br>GN=LUM PE=1 SV=2                                                                                            | 38.405 | 6.61 |
| 213 | A0A0K2BM<br>D8 | Mutant hemoglobin alpha 2<br>globin chain OS=Homo<br>sapiens GN=HBA2 PE=3<br>SV=1                                                      | 15.248 | 8.68 |
| 214 | Q9UL72         | Myosin-reactive<br>immunoglobulin heavy chain                                                                                          | 12.864 | 6.58 |



|     |        |                                                                                                          |        |      |
|-----|--------|----------------------------------------------------------------------------------------------------------|--------|------|
|     |        | variable region (Fragment)<br>OS=Homo sapiens PE=2 SV=1                                                  |        |      |
| 215 | Q9UL90 | Myosin-reactive<br>immunoglobulin heavy chain<br>variable region (Fragment)<br>OS=Homo sapiens PE=2 SV=1 | 12.429 | 8.44 |
| 216 | Q9UL71 | Myosin-reactive<br>immunoglobulin heavy chain<br>variable region (Fragment)<br>OS=Homo sapiens PE=2 SV=1 | 13.145 | 7.12 |
| 217 | Q9UL88 | Myosin-reactive<br>immunoglobulin heavy chain<br>variable region (Fragment)<br>OS=Homo sapiens PE=2 SV=1 | 14.133 | 9.63 |
| 218 | Q9UL89 | Myosin-reactive<br>immunoglobulin heavy chain<br>variable region (Fragment)<br>OS=Homo sapiens PE=2 SV=1 | 12.597 | 9.1  |
| 219 | Q9UL84 | Myosin-reactive<br>immunoglobulin heavy chain<br>variable region (Fragment)<br>OS=Homo sapiens PE=2 SV=1 | 13.571 | 8.46 |
| 220 | Q9UL85 | Myosin-reactive<br>immunoglobulin kappa chain<br>variable region (Fragment)<br>OS=Homo sapiens PE=2 SV=1 | 11.754 | 8.51 |
| 221 | Q9UL86 | Myosin-reactive<br>immunoglobulin kappa chain<br>variable region (Fragment)<br>OS=Homo sapiens PE=2 SV=1 | 11.921 | 7.96 |
| 222 | Q9UL70 | Myosin-reactive<br>immunoglobulin light chain<br>variable region (Fragment)<br>OS=Homo sapiens PE=2 SV=1 | 11.626 | 9.36 |
| 223 | Q9UL82 | Myosin-reactive<br>immunoglobulin light chain<br>variable region (Fragment)<br>OS=Homo sapiens PE=2 SV=1 | 11.438 | 6.6  |
| 224 | Q96PD5 | N-acetylmuramoyl-L-alanine<br>amidase OS=Homo sapiens<br>GN=PGLYRP2 PE=1 SV=1                            | 62.178 | 7.55 |
| 225 | W8DAS2 | NADH-ubiquinone<br>oxidoreductase chain 5<br>OS=Homo sapiens GN=ND5                                      | 66.992 | 9.03 |

|     |                |                                                                                  |        |      |
|-----|----------------|----------------------------------------------------------------------------------|--------|------|
|     |                | PE=3 SV=1                                                                        |        |      |
| 226 | A2NKM6         | NANUC-1 heavy chain<br>(Fragment) OS=Homo sapiens<br>PE=2 SV=1                   | 13.095 | 9.95 |
| 227 | H0YAC1         | Plasma kallikrein (Fragment)<br>OS=Homo sapiens<br>GN=KLKB1 PE=1 SV=1            | 76.833 | 8.06 |
| 228 | E9PGN7         | Plasma protease C1 inhibitor<br>OS=Homo sapiens<br>GN=SERPING1 PE=1 SV=1         | 59.455 | 6.76 |
| 229 | P02760         | Protein AMBP OS=Homo<br>sapiens GN=AMBP PE=1<br>SV=1                             | 38.974 | 6.25 |
| 230 | A0A0C4DH3<br>1 | Protein IGHV1-18 (Fragment)<br>OS=Homo sapiens<br>GN=IGHV1-18 PE=1 SV=1          | 12.812 | 8.84 |
| 231 | A0A0C4DH3<br>3 | Protein IGHV1-24 (Fragment)<br>OS=Homo sapiens<br>GN=IGHV1-24 PE=4 SV=1          | 12.816 | 5.16 |
| 232 | A0A0A0MS1<br>4 | Protein IGHV1-45 (Fragment)<br>OS=Homo sapiens<br>GN=IGHV1-45 PE=1 SV=1          | 13.5   | 9.1  |
| 233 | A0A0B4J2H0     | Protein IGHV1-69-2<br>(Fragment) OS=Homo sapiens<br>GN=IGHV1-69-2 PE=4 SV=1      | 12.652 | 8.47 |
| 234 | A0A075B7D<br>0 | Protein IGHV1OR15-1<br>(Fragment) OS=Homo sapiens<br>GN=IGHV1OR15-1 PE=4<br>SV=1 | 13.003 | 9.13 |
| 235 | A0A0B4J1V2     | Protein IGHV2-26 (Fragment)<br>OS=Homo sapiens<br>GN=IGHV2-26 PE=1 SV=1          | 13.174 | 8.29 |
| 236 | A0A0A0MS1<br>1 | Protein IGHV3-13 (Fragment)<br>OS=Homo sapiens<br>GN=IGHV3-13 PE=1 SV=1          | 12.498 | 7.08 |
| 237 | A0A0C4DH3<br>2 | Protein IGHV3-20 (Fragment)<br>OS=Homo sapiens<br>GN=IGHV3-20 PE=1 SV=1          | 12.709 | 7.99 |
| 238 | A0A0C4DH3<br>5 | Protein IGHV3-35 (Fragment)<br>OS=Homo sapiens<br>GN=IGHV3-35 PE=1 SV=1          | 12.802 | 7.88 |
| 239 | A0A0C4DH3<br>6 | Protein IGHV3-38 (Fragment)<br>OS=Homo sapiens<br>GN=IGHV3-38 PE=1 SV=1          | 12.75  | 9.25 |

|     |                |                                                                           |        |      |
|-----|----------------|---------------------------------------------------------------------------|--------|------|
| 240 | A0A087WW<br>F0 | Protein IGHV3-64 OS=Homo sapiens GN=IGHV3-64 PE=4 SV=1                    | 8.3    | 8.73 |
| 241 | A0A087WW<br>89 | Protein IGHV3-72 OS=Homo sapiens GN=IGHV3-72 PE=1 SV=1                    | 11.16  | 7.97 |
| 242 | A0A0B4J1X5     | Protein IGHV3-74 (Fragment) OS=Homo sapiens GN=IGHV3-74 PE=1 SV=1         | 12.831 | 8.66 |
| 243 | A0A075B7F0     | Protein IGHV3OR16-10 (Fragment) OS=Homo sapiens GN=IGHV3OR16-10 PE=1 SV=1 | 12.571 | 8.66 |
| 244 | A0A075B7B8     | Protein IGHV3OR16-12 (Fragment) OS=Homo sapiens GN=IGHV3OR16-12 PE=1 SV=1 | 12.866 | 6.51 |
| 245 | A0A0C4DH3<br>4 | Protein IGHV4-28 (Fragment) OS=Homo sapiens GN=IGHV4-28 PE=1 SV=1         | 13.116 | 9.29 |
| 246 | A0A087WSY<br>4 | Protein IGHV4-31 (Fragment) OS=Homo sapiens GN=IGHV4-31 PE=4 SV=1         | 13.017 | 9.67 |
| 247 | A0A0C4DH3<br>8 | Protein IGHV5-51 (Fragment) OS=Homo sapiens GN=IGHV5-51 PE=1 SV=1         | 12.666 | 8.27 |
| 248 | A0A0A0MT6<br>9 | Protein IGKJ4 (Fragment) OS=Homo sapiens GN=IGKJ4 PE=1 SV=1               | 1.249  | 8.84 |
| 249 | A0A0A0MT7<br>4 | Protein IGKV1-16 (Fragment) OS=Homo sapiens GN=IGKV1-16 PE=1 SV=1         | 12.61  | 8.16 |
| 250 | A0A087WZH<br>9 | Protein IGKV1-33 OS=Homo sapiens GN=IGKV1D-33 PE=4 SV=1                   | 11.835 | 5.34 |
| 251 | A0A087WW<br>V8 | Protein IGKV1-8 OS=Homo sapiens GN=IGKV1-8 PE=4 SV=1                      | 25.555 | 8.5  |
| 252 | A0A075B6R9     | Protein IGKV2D-24 (Fragment) OS=Homo sapiens GN=IGKV2D-24 PE=4 SV=1       | 13.071 | 8.87 |
| 253 | A0A087X0P6     | Protein IGKV2D-29 OS=Homo sapiens GN=IGKV2D-29 PE=1 SV=1                  | 11.185 | 5.94 |

|     |                |                                                                                                        |         |      |
|-----|----------------|--------------------------------------------------------------------------------------------------------|---------|------|
| 254 | A0A087WZ<br>W8 | Protein IGKV3-11 OS=Homo sapiens GN=IGKV3-11 PE=4 SV=1                                                 | 25.585  | 6.01 |
| 255 | A0A075B6H<br>7 | Protein IGKV3-7 (Fragment) OS=Homo sapiens GN=IGKV3-7 PE=4 SV=1                                        | 12.775  | 5.25 |
| 256 | A0A0C4DH2<br>5 | Protein IGKV3D-20 (Fragment) OS=Homo sapiens GN=IGKV3D-20 PE=1 SV=1                                    | 12.507  | 4.59 |
| 257 | A0A0A0MT3<br>6 | Protein IGKV6D-21 (Fragment) OS=Homo sapiens GN=IGKV6D-21 PE=4 SV=1                                    | 12.332  | 7.28 |
| 258 | A0A075B6I4     | Protein IGLV10-54 (Fragment) OS=Homo sapiens GN=IGLV10-54 PE=1 SV=1                                    | 12.387  | 8.03 |
| 259 | A0A075B6J8     | Protein IGLV3-19 (Fragment) OS=Homo sapiens GN=IGLV3-19 PE=1 SV=1                                      | 12.035  | 4.96 |
| 260 | A0A075B6J3     | Protein IGLV3-27 (Fragment) OS=Homo sapiens GN=IGLV3-27 PE=1 SV=1                                      | 12.157  | 5.01 |
| 261 | A0A075B6I1     | Protein IGLV4-60 (Fragment) OS=Homo sapiens GN=IGLV4-60 PE=1 SV=1                                      | 12.979  | 6.25 |
| 262 | A0A087WSX<br>0 | Protein IGLV5-45 (Fragment) OS=Homo sapiens GN=IGLV5-45 PE=1 SV=1                                      | 13.153  | 7.2  |
| 263 | P00734         | Prothrombin OS=Homo sapiens GN=F2 PE=1 SV=2                                                            | 69.992  | 5.9  |
| 264 | Q9H158         | Protocadherin alpha-C1 OS=Homo sapiens GN=PCDHAC1 PE=2 SV=2                                            | 103.877 | 5.21 |
| 265 | Q96QS0         | Putative matrix cell adhesion molecule-3 OS=Homo sapiens PE=2 SV=1                                     | 17.485  | 9.29 |
| 266 | Q6N091         | Putative uncharacterized protein DKFZp686C02220 (Fragment) OS=Homo sapiens GN=DKFZp686C02220 PE=2 SV=1 | 54.126  | 6.34 |
| 267 | Q6MZV7         | Putative uncharacterized protein DKFZp686C11235 OS=Homo sapiens GN=DKFZp686C11235 PE=2                 | 52.088  | 7.58 |

|     |        |                                                                                                                 |        |      |
|-----|--------|-----------------------------------------------------------------------------------------------------------------|--------|------|
|     |        | SV=1                                                                                                            |        |      |
| 268 | Q6MZU6 | Putative uncharacterized protein DKFZp686C15213<br>OS=Homo sapiens<br>GN=DKFZp686C15213 PE=2<br>SV=1            | 51.066 | 7.71 |
| 269 | Q6MZQ6 | Putative uncharacterized protein DKFZp686G11190<br>OS=Homo sapiens<br>GN=DKFZp686G11190 PE=2<br>SV=1            | 52.01  | 8.06 |
| 270 | Q6N093 | Putative uncharacterized protein DKFZp686I04196<br>(Fragment) OS=Homo sapiens<br>GN=DKFZp686I04196 PE=2<br>SV=1 | 46.032 | 7.59 |
| 271 | Q6N095 | Putative uncharacterized protein DKFZp686K03196<br>OS=Homo sapiens<br>GN=DKFZp686K03196 PE=1<br>SV=1            | 52.327 | 8.57 |
| 272 | Q6N092 | Putative uncharacterized protein DKFZp686K18196<br>(Fragment) OS=Homo sapiens<br>GN=DKFZp686K18196 PE=2<br>SV=1 | 56.388 | 6.93 |
| 273 | Q6MZV6 | Putative uncharacterized protein DKFZp686L19235<br>OS=Homo sapiens<br>GN=DKFZp686L19235 PE=2<br>SV=1            | 51.606 | 5.77 |
| 274 | Q6MZX7 | Putative uncharacterized protein DKFZp686M24218<br>OS=Homo sapiens<br>GN=DKFZp686M24218 PE=2<br>SV=1            | 52.387 | 7.77 |
| 275 | Q7Z351 | Putative uncharacterized protein DKFZp686N02209<br>OS=Homo sapiens<br>GN=DKFZp686N02209 PE=2<br>SV=1            | 52.819 | 8.48 |
| 276 | Q6N094 | Putative uncharacterized protein DKFZp686O01196<br>OS=Homo sapiens                                              | 52.579 | 8.18 |

|     |        |                                                                                                         |        |      |
|-----|--------|---------------------------------------------------------------------------------------------------------|--------|------|
|     |        | GN=DKFZp686O01196 PE=2<br>SV=1                                                                          |        |      |
| 277 | Q6N089 | Putative uncharacterized<br>protein DKFZp686P15220<br>OS=Homo sapiens<br>GN=DKFZp686P15220 PE=1<br>SV=1 | 51.692 | 7.93 |
| 278 | Q5CZ94 | Putative uncharacterized<br>protein DKFZp781M0386<br>OS=Homo sapiens<br>GN=DKFZp781M0386 PE=2<br>SV=1   | 24.986 | 7.27 |
| 279 | P02753 | Retinol-binding protein 4<br>OS=Homo sapiens GN=RBP4<br>PE=1 SV=3                                       | 22.995 | 6.07 |
| 280 | A0N5G1 | Rheumatoid factor C6 light<br>chain (Fragment) OS=Homo<br>sapiens GN=V<kappa>1 PE=2<br>SV=1             | 12.52  | 8.46 |
| 281 | A0N5G7 | Rheumatoid factor D5 heavy<br>chain (Fragment) OS=Homo<br>sapiens GN=VH3 PE=2 SV=1                      | 12.978 | 8.94 |
| 282 | A0N5G5 | Rheumatoid factor D5 light<br>chain (Fragment) OS=Homo<br>sapiens GN=V<kappa>3 PE=2<br>SV=1             | 12.758 | 8.97 |
| 283 | A0N5G3 | Rheumatoid factor G9 light<br>chain (Fragment) OS=Homo<br>sapiens GN=V<lambda>3<br>PE=2 SV=1            | 12.889 | 6.52 |
| 284 | A2J1N5 | Rheumatoid factor RF-ET6<br>(Fragment) OS=Homo sapiens<br>PE=2 SV=1                                     | 10.443 | 9.13 |
| 285 | A2J1M4 | Rheumatoid factor RF-ET7<br>(Fragment) OS=Homo sapiens<br>PE=2 SV=1                                     | 10.905 | 9.36 |
| 286 | A2J1N6 | Rheumatoid factor RF-ET9<br>(Fragment) OS=Homo sapiens<br>PE=2 SV=1                                     | 12.618 | 8.79 |
| 287 | A2J1M8 | Rheumatoid factor RF-IP12<br>(Fragment) OS=Homo sapiens<br>PE=2 SV=1                                    | 10.678 | 7.99 |
| 288 | A2J1N4 | Rheumatoid factor RF-IP24<br>(Fragment) OS=Homo sapiens                                                 | 10.834 | 7.97 |

|     |                |                                                                                                                                                         |        |      |
|-----|----------------|---------------------------------------------------------------------------------------------------------------------------------------------------------|--------|------|
|     |                | PE=2 SV=1                                                                                                                                               |        |      |
| 289 | A2J1M2         | Rheumatoid factor RF-IP9<br>(Fragment) OS=Homo sapiens<br>PE=2 SV=1                                                                                     | 10.542 | 9.17 |
| 290 | P49908         | Selenoprotein P OS=Homo<br>sapiens GN=SEPP1 PE=1<br>SV=3                                                                                                | 43.156 | 7.87 |
| 291 | C9JVG0         | Serotransferrin (Fragment)<br>OS=Homo sapiens GN=TF<br>PE=1 SV=1                                                                                        | 14.681 | 7.14 |
| 292 | C9JB55         | Serotransferrin (Fragment)<br>OS=Homo sapiens GN=TF<br>PE=1 SV=6                                                                                        | 7.985  | 4.72 |
| 293 | A0A024R6I9     | Serpin peptidase inhibitor,<br>clade A (Alpha-1<br>antiproteinase, antitrypsin),<br>member 4, isoform CRA_a<br>OS=Homo sapiens<br>GN=SERPINA4 PE=3 SV=1 | 48.511 | 7.75 |
| 294 | A0A024R944     | Serpin peptidase inhibitor,<br>clade C (Antithrombin),<br>member 1, isoform CRA_a<br>OS=Homo sapiens<br>GN=SERPINC1 PE=3 SV=1                           | 52.569 | 6.71 |
| 295 | B7WNR0         | Serum albumin OS=Homo<br>sapiens GN=ALB PE=1 SV=1                                                                                                       | 56.175 | 7.14 |
| 296 | P02768         | Serum albumin OS=Homo<br>sapiens GN=ALB PE=1 SV=2                                                                                                       | 69.321 | 6.28 |
| 297 | P27169         | Serum<br>paraoxonase/arylesterase 1<br>OS=Homo sapiens GN=PON1<br>PE=1 SV=3                                                                             | 39.706 | 5.22 |
| 298 | Q9HCC1         | Single chain Fv (Fragment)<br>OS=Homo sapiens PE=1 SV=1                                                                                                 | 12.235 | 8.47 |
| 299 | Q65ZC9         | Single-chain Fv (Fragment)<br>OS=Homo sapiens GN=scFv<br>PE=2 SV=1                                                                                      | 25.554 | 9.11 |
| 300 | P11168         | Solute carrier family 2,<br>facilitated glucose transporter<br>member 2 OS=Homo sapiens<br>GN=SLC2A2 PE=1 SV=1                                          | 57.452 | 7.97 |
| 301 | A0A087WU<br>A9 | T-cell receptor gamma chain C<br>region 1 OS=Homo sapiens<br>GN=TRGC1 PE=4 SV=1                                                                         | 34.816 | 7.99 |

|     |                |                                                                              |         |      |
|-----|----------------|------------------------------------------------------------------------------|---------|------|
| 302 | P05543         | Thyroxine-binding globulin<br>OS=Homo sapiens<br>GN=SERPINA7 PE=1 SV=2       | 46.295  | 6.3  |
| 303 | Q53H26         | Transferrin variant (Fragment)<br>OS=Homo sapiens PE=2 SV=1                  | 77.03   | 7.03 |
| 304 | Q66K66         | Transmembrane protein 198<br>OS=Homo sapiens<br>GN=TMEM198 PE=1 SV=1         | 39.449  | 9.92 |
| 305 | A0A087WT5<br>9 | Transthyretin OS=Homo<br>sapiens GN=TTR PE=1 SV=1                            | 20.133  | 5.33 |
| 306 | A0A0G2JRQ<br>6 | Uncharacterized protein<br>(Fragment) OS=Homo sapiens<br>PE=1 SV=2           | 12.74   | 8.29 |
| 307 | Q8TBD0         | Uncharacterized protein<br>(Fragment) OS=Homo sapiens<br>PE=2 SV=1           | 14.003  | 7.9  |
| 308 | A0A0J9YX35     | Uncharacterized protein<br>(Fragment) OS=Homo sapiens<br>PE=4 SV=1           | 12.814  | 7.85 |
| 309 | Q68DL7         | Uncharacterized protein<br>C18orf63 OS=Homo sapiens<br>GN=C18orf63 PE=2 SV=2 | 77.181  | 9.8  |
| 310 | Q8TCD0         | Uncharacterized protein<br>OS=Homo sapiens PE=1 SV=1                         | 26.218  | 8.06 |
| 311 | B4E1Z4         | Uncharacterized protein<br>OS=Homo sapiens PE=1 SV=1                         | 140.853 | 7.18 |
| 312 | Q6GMV8         | Uncharacterized protein<br>OS=Homo sapiens PE=2 SV=1                         | 24.894  | 6.67 |
| 313 | Q8NEJ1         | Uncharacterized protein<br>OS=Homo sapiens PE=2 SV=1                         | 25.008  | 7.69 |
| 314 | Q7Z2U7         | Uncharacterized protein<br>OS=Homo sapiens PE=2 SV=1                         | 24.999  | 6.38 |
| 315 | A0A5E4         | Uncharacterized protein<br>OS=Homo sapiens PE=2 SV=1                         | 24.731  | 5.94 |
| 316 | Q569I7         | Uncharacterized protein<br>OS=Homo sapiens PE=2 SV=1                         | 20.655  | 5.27 |
| 317 | A2MYD0         | V1-17 protein (Fragment)<br>OS=Homo sapiens GN=V1-17<br>PE=4 SV=1            | 10.39   | 5.19 |
| 318 | Q5NV84         | V1-3 protein (Fragment)<br>OS=Homo sapiens GN=V1-3<br>PE=4 SV=1              | 10.486  | 7.06 |



|     |        |                                                                                                   |        |      |
|-----|--------|---------------------------------------------------------------------------------------------------|--------|------|
| 319 | Q5NV90 | V2-17 protein (Fragment)<br>OS=Homo sapiens GN=V2-17<br>PE=1 SV=1                                 | 10.399 | 4.59 |
| 320 | A2MYD4 | V2-7 protein (Fragment)<br>OS=Homo sapiens GN=V2-7<br>PE=4 SV=1                                   | 10.346 | 5.01 |
| 321 | Q5NV92 | V5-6 protein (Fragment)<br>OS=Homo sapiens GN=V5-6<br>PE=4 SV=1                                   | 10.567 | 6.27 |
| 322 | A2NZ55 | Variable immunoglobulin anti-<br>estradiol heavy chain<br>(Fragment) OS=Homo sapiens<br>PE=2 SV=1 | 13.913 | 8.79 |
| 323 | A2N011 | Vh1-D-J3-region (Fragment)<br>OS=Homo sapiens PE=2 SV=1                                           | 13.743 | 8.47 |
| 324 | Q9Y509 | VH3 protein (Fragment)<br>OS=Homo sapiens GN=VH3<br>PE=2 SV=1                                     | 15.759 | 8.38 |
| 325 | O95973 | VH4 heavy chain variable<br>region (Fragment) OS=Homo<br>sapiens GN=IGM PE=2 SV=1                 | 16.305 | 8.47 |
| 326 | A2N0U2 | VH6DJ protein (Fragment)<br>OS=Homo sapiens<br>GN=VH6DJ PE=2 SV=1                                 | 12.543 | 8.47 |
| 327 | A2N0T1 | VH6DJ protein (Fragment)<br>OS=Homo sapiens<br>GN=VH6DJ PE=2 SV=1                                 | 13.012 | 8.47 |
| 328 | A2N0U4 | VH6DJ protein (Fragment)<br>OS=Homo sapiens<br>GN=VH6DJ PE=2 SV=1                                 | 11.793 | 5.36 |
| 329 | A2N0T9 | VH6DJ protein (Fragment)<br>OS=Homo sapiens<br>GN=VH6DJ PE=2 SV=1                                 | 12.784 | 9.2  |
| 330 | A2N0U1 | VH6DJ protein (Fragment)<br>OS=Homo sapiens<br>GN=VH6DJ PE=2 SV=1                                 | 12.622 | 8.48 |
| 331 | D6RF35 | Vitamin D-binding protein<br>OS=Homo sapiens GN=GC<br>PE=1 SV=1                                   | 52.986 | 5.52 |
| 332 | D9ZGG2 | Vitronectin OS=Homo sapiens<br>GN=VTN PE=4 SV=1                                                   | 54.271 | 5.8  |
| 333 | A2N2F4 | VK3 protein (Fragment)<br>OS=Homo sapiens GN=VK3<br>PE=2 SV=1                                     | 11.879 | 9.51 |

|     |        |                                                                    |        |      |
|-----|--------|--------------------------------------------------------------------|--------|------|
| 334 | A2N2W9 | VL4 protein (Fragment)<br>OS=Homo sapiens GN=VL4<br>PE=4 SV=1      | 8.142  | 7.96 |
| 335 | P25311 | Zinc-alpha-2-glycoprotein<br>OS=Homo sapiens<br>GN=AZGP1 PE=1 SV=2 | 34.237 | 6.05 |

Table S2. The number of total proteins identified in raw human plasma sample.

| No. | Peptides $\geq 2$ . | Protein Name                                                                                               | MW [kDa] | calc. pI |
|-----|---------------------|------------------------------------------------------------------------------------------------------------|----------|----------|
| 1   | Q9NRR6              | 72 kDa inositol polyphosphate<br>5-phosphatase OS=Homo<br>sapiens GN=INPP5E PE=1<br>SV=2                   | 70.162   | 8.95     |
| 2   | O43423              | Acidic leucine-rich nuclear<br>phosphoprotein 32 family<br>member C OS=Homo sapiens<br>GN=ANP32C PE=2 SV=1 | 26.746   | 4.21     |
| 3   | P43652              | Afamin OS=Homo sapiens<br>GN=AFM PE=1 SV=1                                                                 | 69.024   | 5.9      |
| 4   | P02763              | Alpha-1-acid glycoprotein 1<br>OS=Homo sapiens GN=ORM1<br>PE=1 SV=1                                        | 23.497   | 5.02     |
| 5   | P19652              | Alpha-1-acid glycoprotein 2<br>OS=Homo sapiens GN=ORM2<br>PE=1 SV=2                                        | 23.588   | 5.11     |
| 6   | P01011              | Alpha-1-antichymotrypsin<br>OS=Homo sapiens<br>GN=SERPINA3 PE=1 SV=2                                       | 47.621   | 5.52     |
| 7   | P01009              | Alpha-1-antitrypsin OS=Homo<br>sapiens GN=SERPINA1 PE=1<br>SV=3                                            | 46.707   | 5.59     |
| 8   | P04217              | Alpha-1B-glycoprotein<br>OS=Homo sapiens GN=A1BG<br>PE=1 SV=4                                              | 54.22    | 5.86     |
| 9   | P08697              | Alpha-2-antiplasmin<br>OS=Homo sapiens<br>GN=SERPINF2 PE=1 SV=3                                            | 54.531   | 6.29     |
| 10  | P02765              | Alpha-2-HS-glycoprotein<br>OS=Homo sapiens GN=AHSG<br>PE=1 SV=1                                            | 39.3     | 5.72     |
| 11  | P01023              | Alpha-2-macroglobulin                                                                                      | 163.188  | 6.46     |

|    |        |                                                               |         |      |
|----|--------|---------------------------------------------------------------|---------|------|
|    |        | OS=Homo sapiens GN=A2M<br>PE=1 SV=3                           |         |      |
| 12 | P01019 | Angiotensinogen OS=Homo<br>sapiens GN=AGT PE=1 SV=1           | 53.121  | 6.32 |
| 13 | P01008 | Antithrombin-III OS=Homo<br>sapiens GN=SERPINC1 PE=1<br>SV=1  | 52.569  | 6.71 |
| 14 | P02647 | Apolipoprotein A-I OS=Homo<br>sapiens GN=APOA1 PE=1<br>SV=1   | 30.759  | 5.76 |
| 15 | P02652 | Apolipoprotein A-II OS=Homo<br>sapiens GN=APOA2 PE=1<br>SV=1  | 11.168  | 6.62 |
| 16 | P06727 | Apolipoprotein A-IV<br>OS=Homo sapiens<br>GN=APOA4 PE=1 SV=3  | 45.371  | 5.38 |
| 17 | P04114 | Apolipoprotein B-100<br>OS=Homo sapiens GN=APOB<br>PE=1 SV=2  | 515.283 | 7.05 |
| 18 | P02654 | Apolipoprotein C-I OS=Homo<br>sapiens GN=APOC1 PE=1<br>SV=1   | 9.326   | 8.47 |
| 19 | P02655 | Apolipoprotein C-II OS=Homo<br>sapiens GN=APOC2 PE=1<br>SV=1  | 11.277  | 4.72 |
| 20 | P02656 | Apolipoprotein C-III<br>OS=Homo sapiens<br>GN=APOC3 PE=1 SV=1 | 10.845  | 5.41 |
| 21 | P55056 | Apolipoprotein C-IV<br>OS=Homo sapiens<br>GN=APOC4 PE=1 SV=1  | 14.543  | 8.92 |
| 22 | P05090 | Apolipoprotein D OS=Homo<br>sapiens GN=APOD PE=1<br>SV=1      | 21.262  | 5.15 |
| 23 | P02649 | Apolipoprotein E OS=Homo<br>sapiens GN=APOE PE=1<br>SV=1      | 36.132  | 5.73 |
| 24 | Q13790 | Apolipoprotein F OS=Homo<br>sapiens GN=APOF PE=1<br>SV=2      | 35.377  | 5.64 |
| 25 | O14791 | Apolipoprotein L1 OS=Homo<br>sapiens GN=APOL1 PE=1<br>SV=5    | 43.947  | 5.81 |

|    |        |                                                                                 |         |      |
|----|--------|---------------------------------------------------------------------------------|---------|------|
| 26 | O95445 | Apolipoprotein M OS=Homo sapiens GN=APOM PE=1 SV=2                              | 21.239  | 6.01 |
| 27 | P08519 | Apolipoprotein(a) OS=Homo sapiens GN=LPA PE=1 SV=1                              | 500.995 | 5.88 |
| 28 | Q86UQ4 | ATP-binding cassette sub-family A member 13 OS=Homo sapiens GN=ABCA13 PE=2 SV=3 | 575.791 | 6.46 |
| 29 | Q9NP78 | ATP-binding cassette sub-family B member 9 OS=Homo sapiens GN=ABCB9 PE=1 SV=1   | 84.421  | 7.93 |
| 30 | O75882 | Attractin OS=Homo sapiens GN=ATR1 PE=1 SV=2                                     | 158.432 | 7.31 |
| 31 | P02749 | Beta-2-glycoprotein 1 OS=Homo sapiens GN=APOH PE=1 SV=3                         | 38.273  | 7.97 |
| 32 | P61769 | Beta-2-microglobulin OS=Homo sapiens GN=B2M PE=1 SV=1                           | 13.706  | 6.52 |
| 33 | Q96KN2 | Beta-Ala-His dipeptidase OS=Homo sapiens GN=CNDP1 PE=1 SV=4                     | 56.67   | 5.3  |
| 34 | P43251 | Biotinidase OS=Homo sapiens GN=BTD PE=1 SV=2                                    | 61.093  | 6.25 |
| 35 | P04003 | C4b-binding protein alpha chain OS=Homo sapiens GN=C4BPA PE=1 SV=2              | 66.989  | 7.3  |
| 36 | P20851 | C4b-binding protein beta chain OS=Homo sapiens GN=C4BPB PE=1 SV=1               | 28.338  | 5.14 |
| 37 | P33151 | Cadherin-5 OS=Homo sapiens GN=CDH5 PE=1 SV=5                                    | 87.474  | 5.43 |
| 38 | P00915 | Carbonic anhydrase 1 OS=Homo sapiens GN=CA1 PE=1 SV=2                           | 28.852  | 7.12 |
| 39 | P23280 | Carbonic anhydrase 6 OS=Homo sapiens GN=CA6 PE=1 SV=3                           | 35.345  | 7.02 |
| 40 | Q96IY4 | Carboxypeptidase B2 OS=Homo sapiens GN=CPB2 PE=1 SV=2                           | 48.393  | 7.71 |

|    |        |                                                                      |         |      |
|----|--------|----------------------------------------------------------------------|---------|------|
| 41 | P15169 | Carboxypeptidase N catalytic chain OS=Homo sapiens GN=CPN1 PE=1 SV=1 | 52.253  | 7.34 |
| 42 | P22792 | Carboxypeptidase N subunit 2 OS=Homo sapiens GN=CPN2 PE=1 SV=3       | 60.518  | 5.99 |
| 43 | O43866 | CD5 antigen-like OS=Homo sapiens GN=CD5L PE=1 SV=1                   | 38.063  | 5.47 |
| 44 | P00450 | Ceruloplasmin OS=Homo sapiens GN=CP PE=1 SV=1                        | 122.128 | 5.72 |
| 45 | P11597 | Cholesteryl ester transfer protein OS=Homo sapiens GN=CETP PE=1 SV=2 | 54.721  | 6.09 |
| 46 | P06276 | Cholinesterase OS=Homo sapiens GN=BCHE PE=1 SV=1                     | 68.374  | 7.42 |
| 47 | P10909 | Clusterin OS=Homo sapiens GN=CLU PE=1 SV=1                           | 52.461  | 6.27 |
| 48 | P00740 | Coagulation factor IX OS=Homo sapiens GN=F9 PE=1 SV=2                | 51.745  | 5.47 |
| 49 | P12259 | Coagulation factor V OS=Homo sapiens GN=F5 PE=1 SV=4                 | 251.546 | 6.05 |
| 50 | P00742 | Coagulation factor X OS=Homo sapiens GN=F10 PE=1 SV=2                | 54.697  | 5.94 |
| 51 | P03951 | Coagulation factor XI OS=Homo sapiens GN=F11 PE=1 SV=1               | 70.064  | 8.1  |
| 52 | P00748 | Coagulation factor XII OS=Homo sapiens GN=F12 PE=1 SV=3              | 67.748  | 7.74 |
| 53 | P00488 | Coagulation factor XIII A chain OS=Homo sapiens GN=F13A1 PE=1 SV=4   | 83.215  | 6.09 |
| 54 | P05160 | Coagulation factor XIII B chain OS=Homo sapiens GN=F13B PE=1 SV=3    | 75.461  | 6.39 |
| 55 | Q9BWP8 | Collectin-11 OS=Homo sapiens GN=COLEC11 PE=1 SV=1                    | 28.647  | 5.41 |

|    |        |                                                                                     |         |      |
|----|--------|-------------------------------------------------------------------------------------|---------|------|
| 56 | P02745 | Complement C1q<br>subcomponent subunit A<br>OS=Homo sapiens GN=C1QA<br>PE=1 SV=2    | 26      | 9.11 |
| 57 | P02746 | Complement C1q<br>subcomponent subunit B<br>OS=Homo sapiens GN=C1QB<br>PE=1 SV=3    | 26.704  | 8.63 |
| 58 | P02747 | Complement C1q<br>subcomponent subunit C<br>OS=Homo sapiens GN=C1QC<br>PE=1 SV=3    | 25.757  | 8.41 |
| 59 | P00736 | Complement C1r<br>subcomponent OS=Homo<br>sapiens GN=C1R PE=1 SV=2                  | 80.067  | 6.21 |
| 60 | Q9NZP8 | Complement C1r<br>subcomponent-like protein<br>OS=Homo sapiens GN=C1RL<br>PE=1 SV=2 | 53.464  | 7.2  |
| 61 | P09871 | Complement C1s<br>subcomponent OS=Homo<br>sapiens GN=C1S PE=1 SV=1                  | 76.635  | 4.96 |
| 62 | P06681 | Complement C2 OS=Homo<br>sapiens GN=C2 PE=1 SV=2                                    | 83.214  | 7.42 |
| 63 | P01024 | Complement C3 OS=Homo<br>sapiens GN=C3 PE=1 SV=2                                    | 187.03  | 6.4  |
| 64 | P0C0L4 | Complement C4-A OS=Homo<br>sapiens GN=C4A PE=1 SV=2                                 | 192.664 | 7.08 |
| 65 | P0C0L5 | Complement C4-B OS=Homo<br>sapiens GN=C4B PE=1 SV=2                                 | 192.631 | 7.27 |
| 66 | P01031 | Complement C5 OS=Homo<br>sapiens GN=C5 PE=1 SV=4                                    | 188.186 | 6.52 |
| 67 | P13671 | Complement component C6<br>OS=Homo sapiens GN=C6<br>PE=1 SV=3                       | 104.718 | 6.76 |
| 68 | P10643 | Complement component C7<br>OS=Homo sapiens GN=C7<br>PE=1 SV=2                       | 93.457  | 6.48 |
| 69 | P07357 | Complement component C8<br>alpha chain OS=Homo sapiens<br>GN=C8A PE=1 SV=2          | 65.121  | 6.47 |
| 70 | P07358 | Complement component C8<br>beta chain OS=Homo sapiens<br>GN=C8B PE=1 SV=3           | 67.003  | 8.13 |

|    |        |                                                                                                         |         |      |
|----|--------|---------------------------------------------------------------------------------------------------------|---------|------|
| 71 | P07360 | Complement component C8<br>gamma chain OS=Homo<br>sapiens GN=C8G PE=1 SV=3                              | 22.264  | 8.31 |
| 72 | P02748 | Complement component C9<br>OS=Homo sapiens GN=C9<br>PE=1 SV=2                                           | 63.133  | 5.59 |
| 73 | P00751 | Complement factor B<br>OS=Homo sapiens GN=CFB<br>PE=1 SV=2                                              | 85.479  | 7.06 |
| 74 | P08603 | Complement factor H<br>OS=Homo sapiens GN=CFH<br>PE=1 SV=4                                              | 139.005 | 6.61 |
| 75 | Q03591 | Complement factor H-related<br>protein 1 OS=Homo sapiens<br>GN=CFHR1 PE=1 SV=2                          | 37.626  | 7.39 |
| 76 | Q9BXR6 | Complement factor H-related<br>protein 5 OS=Homo sapiens<br>GN=CFHR5 PE=1 SV=1                          | 64.377  | 7.06 |
| 77 | P05156 | Complement factor I<br>OS=Homo sapiens GN=CFI<br>PE=1 SV=2                                              | 65.707  | 7.5  |
| 78 | P08185 | Corticosteroid-binding<br>globulin OS=Homo sapiens<br>GN=SERPINA6 PE=1 SV=1                             | 45.112  | 6.04 |
| 79 | P54108 | Cysteine-rich secretory protein<br>3 OS=Homo sapiens<br>GN=CRISP3 PE=1 SV=1                             | 27.612  | 7.8  |
| 80 | Q8NF50 | Dedicator of cytokinesis<br>protein 8 OS=Homo sapiens<br>GN=DOCK8 PE=1 SV=3                             | 238.377 | 6.87 |
| 81 | P09172 | Dopamine beta-hydroxylase<br>OS=Homo sapiens GN=DBH<br>PE=1 SV=3                                        | 69.021  | 6.42 |
| 82 | Q12805 | EGF-containing fibulin-like<br>extracellular matrix protein 1<br>OS=Homo sapiens<br>GN=EFEMP1 PE=1 SV=2 | 54.604  | 5.07 |
| 83 | Q16610 | Extracellular matrix protein 1<br>OS=Homo sapiens GN=ECM1<br>PE=1 SV=2                                  | 60.635  | 6.71 |
| 84 | Q9UGM5 | Fetuin-B OS=Homo sapiens<br>GN=FETUB PE=1 SV=2                                                          | 42.028  | 6.83 |
| 85 | P02671 | Fibrinogen alpha chain<br>OS=Homo sapiens GN=FGA                                                        | 94.914  | 6.01 |

|     |        |                                                                          |        |      |
|-----|--------|--------------------------------------------------------------------------|--------|------|
|     |        | PE=1 SV=2                                                                |        |      |
| 86  | P02675 | Fibrinogen beta chain<br>OS=Homo sapiens GN=FGB<br>PE=1 SV=2             | 55.892 | 8.27 |
| 87  | P02679 | Fibrinogen gamma chain<br>OS=Homo sapiens GN=FGG<br>PE=1 SV=3            | 51.479 | 5.62 |
| 88  | P02751 | Fibronectin OS=Homo sapiens<br>GN=FN1 PE=1 SV=4                          | 262.46 | 5.71 |
| 89  | P23142 | Fibulin-1 OS=Homo sapiens<br>GN=FBLN1 PE=1 SV=4                          | 77.162 | 5.22 |
| 90  | Q15485 | Ficolin-2 OS=Homo sapiens<br>GN=FCN2 PE=1 SV=2                           | 33.98  | 6.77 |
| 91  | O75636 | Ficolin-3 OS=Homo sapiens<br>GN=FCN3 PE=1 SV=2                           | 32.882 | 6.67 |
| 92  | Q8IVH2 | Forkhead box protein P4<br>OS=Homo sapiens<br>GN=FOXP4 PE=1 SV=1         | 73.443 | 6.4  |
| 93  | Q08380 | Galectin-3-binding protein<br>OS=Homo sapiens<br>GN=LGALS3BP PE=1 SV=1   | 65.289 | 5.27 |
| 94  | P06396 | Gelsolin OS=Homo sapiens<br>GN=GSN PE=1 SV=1                             | 85.644 | 6.28 |
| 95  | P22352 | Glutathione peroxidase 3<br>OS=Homo sapiens GN=GPX3<br>PE=1 SV=2         | 25.537 | 8.13 |
| 96  | P00738 | Haptoglobin OS=Homo<br>sapiens GN=HP PE=1 SV=1                           | 45.177 | 6.58 |
| 97  | P00739 | Haptoglobin-related protein<br>OS=Homo sapiens GN=HPR<br>PE=1 SV=2       | 39.005 | 7.09 |
| 98  | Q96MM6 | Heat shock 70 kDa protein 12B<br>OS=Homo sapiens<br>GN=HSPA12B PE=2 SV=2 | 75.64  | 8.53 |
| 99  | P69905 | Hemoglobin subunit alpha<br>OS=Homo sapiens GN=HBA1<br>PE=1 SV=2         | 15.248 | 8.68 |
| 100 | P68871 | Hemoglobin subunit beta<br>OS=Homo sapiens GN=HBB<br>PE=1 SV=2           | 15.988 | 7.28 |
| 101 | P02790 | Hemopexin OS=Homo sapiens<br>GN=HPX PE=1 SV=2                            | 51.643 | 7.02 |
| 102 | P05546 | Heparin cofactor 2 OS=Homo<br>sapiens GN=SERPIND1 PE=1                   | 57.034 | 6.9  |



|     |        |                                                                            |        |      |
|-----|--------|----------------------------------------------------------------------------|--------|------|
|     |        | SV=3                                                                       |        |      |
| 103 | Q04756 | Hepatocyte growth factor activator OS=Homo sapiens<br>GN=HGFA1 PE=1 SV=1   | 70.636 | 7.24 |
| 104 | P26927 | Hepatocyte growth factor-like protein OS=Homo sapiens<br>GN=MST1 PE=1 SV=2 | 80.268 | 7.68 |
| 105 | P04196 | Histidine-rich glycoprotein OS=Homo sapiens GN=HRG<br>PE=1 SV=1            | 59.541 | 7.5  |
| 106 | Q14520 | Hyaluronan-binding protein 2 OS=Homo sapiens<br>GN=HABP2 PE=1 SV=1         | 62.63  | 6.54 |
| 107 | P01876 | Ig alpha-1 chain C region OS=Homo sapiens<br>GN=IGHA1 PE=1 SV=2            | 37.631 | 6.51 |
| 108 | P01877 | Ig alpha-2 chain C region OS=Homo sapiens<br>GN=IGHA2 PE=1 SV=3            | 36.503 | 6.1  |
| 109 | P01880 | Ig delta chain C region OS=Homo sapiens GN=IGHD<br>PE=1 SV=2               | 42.227 | 7.93 |
| 110 | P01857 | Ig gamma-1 chain C region OS=Homo sapiens<br>GN=IGHG1 PE=1 SV=1            | 36.083 | 8.19 |
| 111 | P01859 | Ig gamma-2 chain C region OS=Homo sapiens<br>GN=IGHG2 PE=1 SV=2            | 35.878 | 7.59 |
| 112 | P01860 | Ig gamma-3 chain C region OS=Homo sapiens<br>GN=IGHG3 PE=1 SV=2            | 41.26  | 7.9  |
| 113 | P01861 | Ig gamma-4 chain C region OS=Homo sapiens<br>GN=IGHG4 PE=1 SV=1            | 35.918 | 7.36 |
| 114 | P01743 | Ig heavy chain V-I region HG3 OS=Homo sapiens PE=4 SV=1                    | 12.937 | 8.92 |
| 115 | P06326 | Ig heavy chain V-I region Mot OS=Homo sapiens PE=1 SV=1                    | 13.571 | 6.29 |
| 116 | P23083 | Ig heavy chain V-I region V35 OS=Homo sapiens PE=1 SV=1                    | 13     | 9.55 |
| 117 | P06331 | Ig heavy chain V-II region ARH-77 OS=Homo sapiens<br>PE=4 SV=1             | 16.218 | 8.28 |

|     |        |                                                                  |        |      |
|-----|--------|------------------------------------------------------------------|--------|------|
| 118 | P01824 | Ig heavy chain V-II region<br>WAH OS=Homo sapiens PE=1<br>SV=1   | 14.108 | 8.46 |
| 119 | P01766 | Ig heavy chain V-III region<br>BRO OS=Homo sapiens PE=1<br>SV=1  | 13.218 | 6.57 |
| 120 | P01767 | Ig heavy chain V-III region<br>BUT OS=Homo sapiens PE=1<br>SV=1  | 12.371 | 9.25 |
| 121 | P01768 | Ig heavy chain V-III region<br>CAM OS=Homo sapiens PE=1<br>SV=1  | 13.659 | 9.63 |
| 122 | P01769 | Ig heavy chain V-III region<br>GA OS=Homo sapiens PE=1<br>SV=1   | 13.157 | 9.77 |
| 123 | P01781 | Ig heavy chain V-III region<br>GAL OS=Homo sapiens PE=1<br>SV=1  | 12.722 | 8.48 |
| 124 | P80419 | Ig heavy chain V-III region<br>GAR OS=Homo sapiens PE=1<br>SV=1  | 13.079 | 4.81 |
| 125 | P01771 | Ig heavy chain V-III region<br>HIL OS=Homo sapiens PE=1<br>SV=1  | 13.557 | 9.36 |
| 126 | P01780 | Ig heavy chain V-III region<br>JON OS=Homo sapiens PE=1<br>SV=1  | 12.555 | 9.29 |
| 127 | P01772 | Ig heavy chain V-III region<br>KOL OS=Homo sapiens PE=1<br>SV=1  | 13.709 | 5.87 |
| 128 | P01765 | Ig heavy chain V-III region<br>TIL OS=Homo sapiens PE=1<br>SV=1  | 12.348 | 9.13 |
| 129 | P01762 | Ig heavy chain V-III region<br>TRO OS=Homo sapiens PE=1<br>SV=1  | 13.464 | 9.72 |
| 130 | P01779 | Ig heavy chain V-III region<br>TUR OS=Homo sapiens PE=1<br>SV=1  | 12.423 | 9.73 |
| 131 | P01764 | Ig heavy chain V-III region<br>VH26 OS=Homo sapiens<br>PE=1 SV=1 | 12.574 | 8.28 |
| 132 | P01776 | Ig heavy chain V-III region<br>WAS OS=Homo sapiens PE=1          | 13.082 | 7.99 |

|     |        |                                                                                          |        |      |
|-----|--------|------------------------------------------------------------------------------------------|--------|------|
|     |        | SV=1                                                                                     |        |      |
| 133 | P01763 | Ig heavy chain V-III region<br>WEA OS=Homo sapiens PE=1<br>SV=1                          | 12.249 | 8.5  |
| 134 | P01778 | Ig heavy chain V-III region<br>ZAP OS=Homo sapiens PE=1<br>SV=1                          | 12.574 | 8.51 |
| 135 | P01834 | Ig kappa chain C region<br>OS=Homo sapiens GN=IGKC<br>PE=1 SV=1                          | 11.602 | 5.87 |
| 136 | P01593 | Ig kappa chain V-I region AG<br>OS=Homo sapiens PE=1 SV=1                                | 11.985 | 5.99 |
| 137 | P04430 | Ig kappa chain V-I region<br>BAN OS=Homo sapiens PE=1<br>SV=1                            | 11.833 | 8.44 |
| 138 | P01596 | Ig kappa chain V-I region CAR<br>OS=Homo sapiens PE=1 SV=1                               | 11.696 | 9.41 |
| 139 | P01597 | Ig kappa chain V-I region DEE<br>OS=Homo sapiens PE=1 SV=1                               | 11.654 | 9.36 |
| 140 | P01598 | Ig kappa chain V-I region EU<br>OS=Homo sapiens PE=1 SV=1                                | 11.781 | 8.44 |
| 141 | P01599 | Ig kappa chain V-I region Gal<br>OS=Homo sapiens PE=1 SV=1                               | 11.807 | 8.88 |
| 142 | P01601 | Ig kappa chain V-I region<br>HK101 (Fragment) OS=Homo<br>sapiens PE=4 SV=1               | 12.791 | 8.16 |
| 143 | P01602 | Ig kappa chain V-I region<br>HK102 (Fragment) OS=Homo<br>sapiens GN=IGKV1-5 PE=4<br>SV=1 | 12.76  | 6.51 |
| 144 | P01604 | Ig kappa chain V-I region Kue<br>OS=Homo sapiens PE=1 SV=1                               | 12.119 | 8.81 |
| 145 | P01605 | Ig kappa chain V-I region Lay<br>OS=Homo sapiens PE=1 SV=1                               | 11.827 | 7.96 |
| 146 | P01612 | Ig kappa chain V-I region Mev<br>OS=Homo sapiens PE=1 SV=1                               | 11.863 | 6.57 |
| 147 | P01613 | Ig kappa chain V-I region Ni<br>OS=Homo sapiens PE=1 SV=1                                | 12.238 | 5.36 |
| 148 | P01608 | Ig kappa chain V-I region Roy<br>OS=Homo sapiens PE=1 SV=1                               | 11.775 | 5.36 |
| 149 | P01609 | Ig kappa chain V-I region Scw<br>OS=Homo sapiens PE=1 SV=1                               | 11.757 | 6    |
| 150 | P04431 | Ig kappa chain V-I region<br>Walker OS=Homo sapiens                                      | 14.06  | 8.97 |

|     |        |                                                                            |        |      |
|-----|--------|----------------------------------------------------------------------------|--------|------|
|     |        | PE=1 SV=1                                                                  |        |      |
| 151 | P01610 | Ig kappa chain V-I region<br>WEA OS=Homo sapiens PE=1<br>SV=1              | 11.833 | 8.91 |
| 152 | P01611 | Ig kappa chain V-I region Wes<br>OS=Homo sapiens PE=1 SV=1                 | 11.601 | 7.28 |
| 153 | P01615 | Ig kappa chain V-II region FR<br>OS=Homo sapiens PE=1 SV=1                 | 12.652 | 7.94 |
| 154 | P01616 | Ig kappa chain V-II region<br>MIL OS=Homo sapiens PE=1<br>SV=1             | 12.048 | 9.29 |
| 155 | P06310 | Ig kappa chain V-II region<br>RPMI 6410 OS=Homo sapiens<br>PE=4 SV=1       | 14.697 | 9.25 |
| 156 | P01617 | Ig kappa chain V-II region<br>TEW OS=Homo sapiens PE=1<br>SV=1             | 12.308 | 6    |
| 157 | P01619 | Ig kappa chain V-III region B6<br>OS=Homo sapiens PE=1 SV=1                | 11.628 | 9.25 |
| 158 | P04207 | Ig kappa chain V-III region<br>CLL OS=Homo sapiens PE=1<br>SV=2            | 14.266 | 8.51 |
| 159 | P04206 | Ig kappa chain V-III region<br>GOL OS=Homo sapiens PE=1<br>SV=1            | 11.823 | 9.25 |
| 160 | P18136 | Ig kappa chain V-III region<br>HIC OS=Homo sapiens PE=2<br>SV=2            | 14.08  | 6.6  |
| 161 | P06311 | Ig kappa chain V-III region<br>IARC/BL41 OS=Homo<br>sapiens PE=1 SV=1      | 14.061 | 6.61 |
| 162 | P01621 | Ig kappa chain V-III region<br>NG9 (Fragment) OS=Homo<br>sapiens PE=1 SV=1 | 10.722 | 6.52 |
| 163 | P01624 | Ig kappa chain V-III region<br>POM OS=Homo sapiens PE=1<br>SV=1            | 11.915 | 8.94 |
| 164 | P01620 | Ig kappa chain V-III region<br>SIE OS=Homo sapiens PE=1<br>SV=1            | 11.768 | 8.48 |
| 165 | P04433 | Ig kappa chain V-III region<br>VG (Fragment) OS=Homo<br>sapiens PE=1 SV=1  | 12.567 | 4.96 |

|     |        |                                                                           |        |      |
|-----|--------|---------------------------------------------------------------------------|--------|------|
| 166 | P04434 | Ig kappa chain V-III region<br>VH (Fragment) OS=Homo<br>sapiens PE=4 SV=1 | 12.749 | 5.94 |
| 167 | P06314 | Ig kappa chain V-IV region<br>B17 OS=Homo sapiens PE=2<br>SV=1            | 14.956 | 6.58 |
| 168 | P06313 | Ig kappa chain V-IV region JI<br>OS=Homo sapiens PE=4 SV=1                | 14.623 | 6.58 |
| 169 | P01625 | Ig kappa chain V-IV region<br>Len OS=Homo sapiens PE=1<br>SV=2            | 12.632 | 7.93 |
| 170 | P04211 | Ig lambda chain V region 4A<br>OS=Homo sapiens PE=4 SV=1                  | 12.372 | 7.03 |
| 171 | P06316 | Ig lambda chain V-I region<br>BL2 OS=Homo sapiens PE=2<br>SV=1            | 13.556 | 7.77 |
| 172 | P01700 | Ig lambda chain V-I region HA<br>OS=Homo sapiens PE=1 SV=1                | 11.889 | 8.91 |
| 173 | P01701 | Ig lambda chain V-I region<br>NEW OS=Homo sapiens PE=1<br>SV=1            | 11.446 | 8    |
| 174 | P01703 | Ig lambda chain V-I region<br>NEWM OS=Homo sapiens<br>PE=1 SV=1           | 10.898 | 9.29 |
| 175 | P04208 | Ig lambda chain V-I region<br>WAH OS=Homo sapiens PE=1<br>SV=1            | 11.718 | 6.54 |
| 176 | P01710 | Ig lambda chain V-II region<br>BO OS=Homo sapiens PE=1<br>SV=1            | 11.778 | 6    |
| 177 | P01708 | Ig lambda chain V-II region<br>BUR OS=Homo sapiens PE=1<br>SV=1           | 11.499 | 7.87 |
| 178 | P01709 | Ig lambda chain V-II region<br>MGC OS=Homo sapiens PE=1<br>SV=1           | 11.551 | 5.29 |
| 179 | P01707 | Ig lambda chain V-II region<br>TRO OS=Homo sapiens PE=1<br>SV=1           | 11.554 | 8.29 |
| 180 | P80748 | Ig lambda chain V-III region<br>LOI OS=Homo sapiens PE=1<br>SV=1          | 11.928 | 5.08 |
| 181 | P01714 | Ig lambda chain V-III region<br>SH OS=Homo sapiens PE=1                   | 11.386 | 6.52 |

|     |        |                                                                                                                 |         |       |
|-----|--------|-----------------------------------------------------------------------------------------------------------------|---------|-------|
|     |        | SV=1                                                                                                            |         |       |
| 182 | P01717 | Ig lambda chain V-IV region<br>Hil OS=Homo sapiens PE=1<br>SV=1                                                 | 11.51   | 6.51  |
| 183 | P01719 | Ig lambda chain V-V region<br>DEL OS=Homo sapiens PE=1<br>SV=1                                                  | 11.336  | 5.36  |
| 184 | P06319 | Ig lambda chain V-VI region<br>EB4 OS=Homo sapiens PE=2<br>SV=1                                                 | 14.138  | 5.05  |
| 185 | P06317 | Ig lambda chain V-VI region<br>SUT OS=Homo sapiens PE=1<br>SV=1                                                 | 12.24   | 5.12  |
| 186 | P0CG05 | Ig lambda-2 chain C regions<br>OS=Homo sapiens GN=IGLC2<br>PE=1 SV=1                                            | 11.287  | 7.24  |
| 187 | P01871 | Ig mu chain C region<br>OS=Homo sapiens GN=IGHM<br>PE=1 SV=3                                                    | 49.276  | 6.77  |
| 188 | P04220 | Ig mu heavy chain disease<br>protein OS=Homo sapiens<br>PE=1 SV=1                                               | 43.03   | 5.24  |
| 189 | Q9Y6R7 | IgGFc-binding protein<br>OS=Homo sapiens<br>GN=FCGBP PE=1 SV=3                                                  | 571.639 | 5.34  |
| 190 | P01591 | Immunoglobulin J chain<br>OS=Homo sapiens GN=IGJ<br>PE=1 SV=4                                                   | 18.087  | 5.24  |
| 191 | P15814 | Immunoglobulin lambda-like<br>polypeptide 1 OS=Homo<br>sapiens GN=IGLL1 PE=1<br>SV=1                            | 22.949  | 10.07 |
| 192 | B9A064 | Immunoglobulin lambda-like<br>polypeptide 5 OS=Homo<br>sapiens GN=IGLL5 PE=2<br>SV=2                            | 23.049  | 8.84  |
| 193 | P17936 | Insulin-like growth factor-<br>binding protein 3 OS=Homo<br>sapiens GN=IGFBP3 PE=1<br>SV=2                      | 31.654  | 8.69  |
| 194 | P35858 | Insulin-like growth factor-<br>binding protein complex acid<br>labile subunit OS=Homo<br>sapiens GN=IGFALS PE=1 | 65.994  | 6.79  |

|     |        |                                                                                 |         |      |
|-----|--------|---------------------------------------------------------------------------------|---------|------|
|     |        | SV=1                                                                            |         |      |
| 195 | P19827 | Inter-alpha-trypsin inhibitor heavy chain H1 OS=Homo sapiens GN=ITIH1 PE=1 SV=3 | 101.326 | 6.79 |
| 196 | P19823 | Inter-alpha-trypsin inhibitor heavy chain H2 OS=Homo sapiens GN=ITIH2 PE=1 SV=2 | 106.397 | 6.86 |
| 197 | Q06033 | Inter-alpha-trypsin inhibitor heavy chain H3 OS=Homo sapiens GN=ITIH3 PE=1 SV=2 | 99.787  | 5.74 |
| 198 | Q14624 | Inter-alpha-trypsin inhibitor heavy chain H4 OS=Homo sapiens GN=ITIH4 PE=1 SV=4 | 103.293 | 6.98 |
| 199 | P29622 | Kallistatin OS=Homo sapiens GN=SERPINA4 PE=1 SV=3                               | 48.511  | 7.75 |
| 200 | P13645 | Keratin, type I cytoskeletal 10 OS=Homo sapiens GN=KRT10 PE=1 SV=6              | 58.792  | 5.21 |
| 201 | P13646 | Keratin, type I cytoskeletal 13 OS=Homo sapiens GN=KRT13 PE=1 SV=4              | 49.557  | 4.96 |
| 202 | P08779 | Keratin, type I cytoskeletal 16 OS=Homo sapiens GN=KRT16 PE=1 SV=4              | 51.236  | 5.05 |
| 203 | P35527 | Keratin, type I cytoskeletal 9 OS=Homo sapiens GN=KRT9 PE=1 SV=3                | 62.027  | 5.24 |
| 204 | P04264 | Keratin, type II cytoskeletal 1 OS=Homo sapiens GN=KRT1 PE=1 SV=6               | 65.999  | 8.12 |
| 205 | P35908 | Keratin, type II cytoskeletal 2 epidermal OS=Homo sapiens GN=KRT2 PE=1 SV=2     | 65.393  | 8    |
| 206 | P13647 | Keratin, type II cytoskeletal 5 OS=Homo sapiens GN=KRT5 PE=1 SV=3               | 62.34   | 7.74 |
| 207 | P01042 | Kininogen-1 OS=Homo sapiens GN=KNG1 PE=1 SV=2                                   | 71.912  | 6.81 |

|     |        |                                                                                                |         |      |
|-----|--------|------------------------------------------------------------------------------------------------|---------|------|
| 208 | P02750 | Leucine-rich alpha-2-glycoprotein OS=Homo sapiens GN=LRG1 PE=1 SV=2                            | 38.154  | 6.95 |
| 209 | P18428 | Lipopolysaccharide-binding protein OS=Homo sapiens GN=LBP PE=1 SV=3                            | 53.35   | 6.7  |
| 210 | P08637 | Low affinity immunoglobulin gamma Fc region receptor III-A OS=Homo sapiens GN=FCGR3A PE=1 SV=2 | 29.071  | 8.07 |
| 211 | P14151 | L-selectin OS=Homo sapiens GN=SELL PE=1 SV=2                                                   | 42.159  | 6.6  |
| 212 | P51884 | Lumican OS=Homo sapiens GN=LUM PE=1 SV=2                                                       | 38.405  | 6.61 |
| 213 | Q9Y5Y7 | Lymphatic vessel endothelial hyaluronic acid receptor 1 OS=Homo sapiens GN=LYVE1 PE=1 SV=2     | 35.191  | 8.28 |
| 214 | P61626 | Lysozyme C OS=Homo sapiens GN=LYZ PE=1 SV=1                                                    | 16.526  | 9.16 |
| 215 | P48740 | Mannan-binding lectin serine protease 1 OS=Homo sapiens GN=MASP1 PE=1 SV=3                     | 79.195  | 5.49 |
| 216 | Q9NR99 | Matrix-remodeling-associated protein 5 OS=Homo sapiens GN=MXRA5 PE=2 SV=3                      | 311.955 | 8.32 |
| 217 | P08571 | Monocyte differentiation antigen CD14 OS=Homo sapiens GN=CD14 PE=1 SV=2                        | 40.051  | 6.23 |
| 218 | Q96PD5 | N-acetylmuramoyl-L-alanine amidase OS=Homo sapiens GN=PGLYRP2 PE=1 SV=1                        | 62.178  | 7.55 |
| 219 | P32004 | Neural cell adhesion molecule L1 OS=Homo sapiens GN=L1CAM PE=1 SV=2                            | 139.915 | 6.24 |
| 220 | P21359 | Neurofibromin OS=Homo sapiens GN=NF1 PE=1 SV=2                                                 | 319.168 | 7.39 |
| 221 | P04180 | Phosphatidylcholine-sterol acyltransferase OS=Homo sapiens GN=LCAT PE=1 SV=1                   | 49.546  | 6.11 |
| 222 | P80108 | Phosphatidylinositol-glycan-specific phospholipase D                                           | 92.278  | 6.37 |



|     |        |                                                                                                  |         |      |
|-----|--------|--------------------------------------------------------------------------------------------------|---------|------|
|     |        | OS=Homo sapiens<br>GN=GPLD1 PE=1 SV=3                                                            |         |      |
| 223 | P55058 | Phospholipid transfer protein<br>OS=Homo sapiens GN=PLTP<br>PE=1 SV=1                            | 54.705  | 7.01 |
| 224 | P36955 | Pigment epithelium-derived<br>factor OS=Homo sapiens<br>GN=SERPINF1 PE=1 SV=4                    | 46.283  | 6.38 |
| 225 | P03952 | Plasma kallikrein OS=Homo<br>sapiens GN=KLKB1 PE=1<br>SV=1                                       | 71.323  | 8.22 |
| 226 | P05155 | Plasma protease C1 inhibitor<br>OS=Homo sapiens<br>GN=SERPING1 PE=1 SV=2                         | 55.119  | 6.55 |
| 227 | P05154 | Plasma serine protease<br>inhibitor OS=Homo sapiens<br>GN=SERPINA5 PE=1 SV=3                     | 45.646  | 9.26 |
| 228 | P00747 | Plasminogen OS=Homo<br>sapiens GN=PLG PE=1 SV=2                                                  | 90.51   | 7.24 |
| 229 | P13796 | Plastin-2 OS=Homo sapiens<br>GN=LCP1 PE=1 SV=6                                                   | 70.244  | 5.43 |
| 230 | P02775 | Platelet basic protein<br>OS=Homo sapiens GN=PPBP<br>PE=1 SV=3                                   | 13.885  | 8.79 |
| 231 | P10720 | Platelet factor 4 variant<br>OS=Homo sapiens GN=PF4V1<br>PE=1 SV=1                               | 11.545  | 9.1  |
| 232 | Q86SR1 | Polypeptide N-<br>acetylgalactosaminyltransferas<br>e 10 OS=Homo sapiens<br>GN=GALNT10 PE=1 SV=2 | 68.948  | 8.59 |
| 233 | Q9UHG3 | Prenylcysteine oxidase 1<br>OS=Homo sapiens<br>GN=PCYOX1 PE=1 SV=3                               | 56.604  | 6.18 |
| 234 | P27918 | Properdin OS=Homo sapiens<br>GN=CFP PE=1 SV=2                                                    | 51.242  | 7.9  |
| 235 | P02760 | Protein AMBP OS=Homo<br>sapiens GN=AMBP PE=1<br>SV=1                                             | 38.974  | 6.25 |
| 236 | Q9UK55 | Protein Z-dependent protease<br>inhibitor OS=Homo sapiens<br>GN=SERPINA10 PE=1 SV=1              | 50.674  | 8.27 |
| 237 | Q92954 | Proteoglycan 4 OS=Homo<br>sapiens GN=PRG4 PE=1                                                   | 150.984 | 9.5  |

|     |        |                                                                                                                       |         |      |
|-----|--------|-----------------------------------------------------------------------------------------------------------------------|---------|------|
|     |        | SV=2                                                                                                                  |         |      |
| 238 | P00734 | Prothrombin OS=Homo sapiens GN=F2 PE=1 SV=2                                                                           | 69.992  | 5.9  |
| 239 | A6NJ16 | Putative V-set and immunoglobulin domain-containing-like protein IGHV4OR15-8 OS=Homo sapiens GN=IGHV4OR15-8 PE=5 SV=2 | 13.576  | 9.6  |
| 240 | P02753 | Retinol-binding protein 4 OS=Homo sapiens GN=RBP4 PE=1 SV=3                                                           | 22.995  | 6.07 |
| 241 | P49908 | Selenoprotein P OS=Homo sapiens GN=SEPP1 PE=1 SV=3                                                                    | 43.156  | 7.87 |
| 242 | P02787 | Serotransferrin OS=Homo sapiens GN=TF PE=1 SV=3                                                                       | 77.014  | 7.12 |
| 243 | P02768 | Serum albumin OS=Homo sapiens GN=ALB PE=1 SV=2                                                                        | 69.321  | 6.28 |
| 244 | P0DJI8 | Serum amyloid A-1 protein OS=Homo sapiens GN=SAA1 PE=1 SV=1                                                           | 13.524  | 6.79 |
| 245 | P35542 | Serum amyloid A-4 protein OS=Homo sapiens GN=SAA4 PE=1 SV=2                                                           | 14.737  | 9.07 |
| 246 | P02743 | Serum amyloid P-component OS=Homo sapiens GN=APCS PE=1 SV=2                                                           | 25.371  | 6.54 |
| 247 | P27169 | Serum paraoxonase/arylesterase 1 OS=Homo sapiens GN=PON1 PE=1 SV=3                                                    | 39.706  | 5.22 |
| 248 | P04278 | Sex hormone-binding globulin OS=Homo sapiens GN=SHBG PE=1 SV=2                                                        | 43.752  | 6.71 |
| 249 | O00391 | Sulfhydryl oxidase 1 OS=Homo sapiens GN=QSOX1 PE=1 SV=3                                                               | 82.526  | 8.92 |
| 250 | Q9BYX2 | TBC1 domain family member 2A OS=Homo sapiens GN=TBC1D2 PE=1 SV=3                                                      | 105.348 | 6.58 |
| 251 | P05452 | Tetranectin OS=Homo sapiens GN=CLEC3B PE=1 SV=3                                                                       | 22.522  | 5.67 |

|     |        |                                                                                          |         |      |
|-----|--------|------------------------------------------------------------------------------------------|---------|------|
| 252 | P07996 | Thrombospondin-1 OS=Homo sapiens GN=THBS1 PE=1 SV=2                                      | 129.3   | 4.94 |
| 253 | P05543 | Thyroxine-binding globulin OS=Homo sapiens GN=SERPINA7 PE=1 SV=2                         | 46.295  | 6.3  |
| 254 | Q15582 | Transforming growth factor-beta-induced protein ig-h3 OS=Homo sapiens GN=TGFBI PE=1 SV=1 | 74.634  | 7.71 |
| 255 | Q66K66 | Transmembrane protein 198 OS=Homo sapiens GN=TMEM198 PE=1 SV=1                           | 39.449  | 9.92 |
| 256 | P02766 | Transthyretin OS=Homo sapiens GN=TTR PE=1 SV=1                                           | 15.877  | 5.76 |
| 257 | Q6ZT98 | Tubulin polyglutamylase TTLL7 OS=Homo sapiens GN=TTLL7 PE=2 SV=2                         | 102.934 | 9.29 |
| 258 | P02774 | Vitamin D-binding protein OS=Homo sapiens GN=GC PE=1 SV=1                                | 52.929  | 5.54 |
| 259 | P04070 | Vitamin K-dependent protein C OS=Homo sapiens GN=PROC PE=1 SV=1                          | 52.037  | 6.28 |
| 260 | P07225 | Vitamin K-dependent protein S OS=Homo sapiens GN=PROS1 PE=1 SV=1                         | 75.074  | 5.67 |
| 261 | P22891 | Vitamin K-dependent protein Z OS=Homo sapiens GN=PROZ PE=1 SV=2                          | 44.715  | 5.97 |
| 262 | P04004 | Vitronectin OS=Homo sapiens GN=VTN PE=1 SV=1                                             | 54.271  | 5.8  |
| 263 | P04275 | von Willebrand factor OS=Homo sapiens GN=VWF PE=1 SV=4                                   | 309.058 | 5.48 |
| 264 | P12955 | Xaa-Pro dipeptidase OS=Homo sapiens GN=PEPD PE=1 SV=3                                    | 54.513  | 6    |
| 265 | P25311 | Zinc-alpha-2-glycoprotein OS=Homo sapiens GN=AZGP1 PE=1 SV=2                             | 34.237  | 6.05 |
